# Supplementary material for: Tp53 Suppression Promotes Cardiomyocyte Proliferation during Zebrafish Heart Regeneration
Source: PubMed Central journal article supplement — Cell Rep. Author manuscript; Available in PMC 2020 Sep 16. (PMC7494019; doi:10.1016/j.celrep.2020.108089), 2020-09-01
Supplement: NIHMS1627845-supplement-1.pdf [file NIHMS1627845-supplement-1.pdf]

**Cell Reports, Volume 32**

**Supplemental Information**

**Tp53 Suppression Promotes  
Cardiomyocyte Proliferation  
during Zebrafish Heart Regeneration**

**Adam Shoffner, Valentina Cigliola, Nutishia Lee, Jianhong Ou, and Kenneth D. Poss**

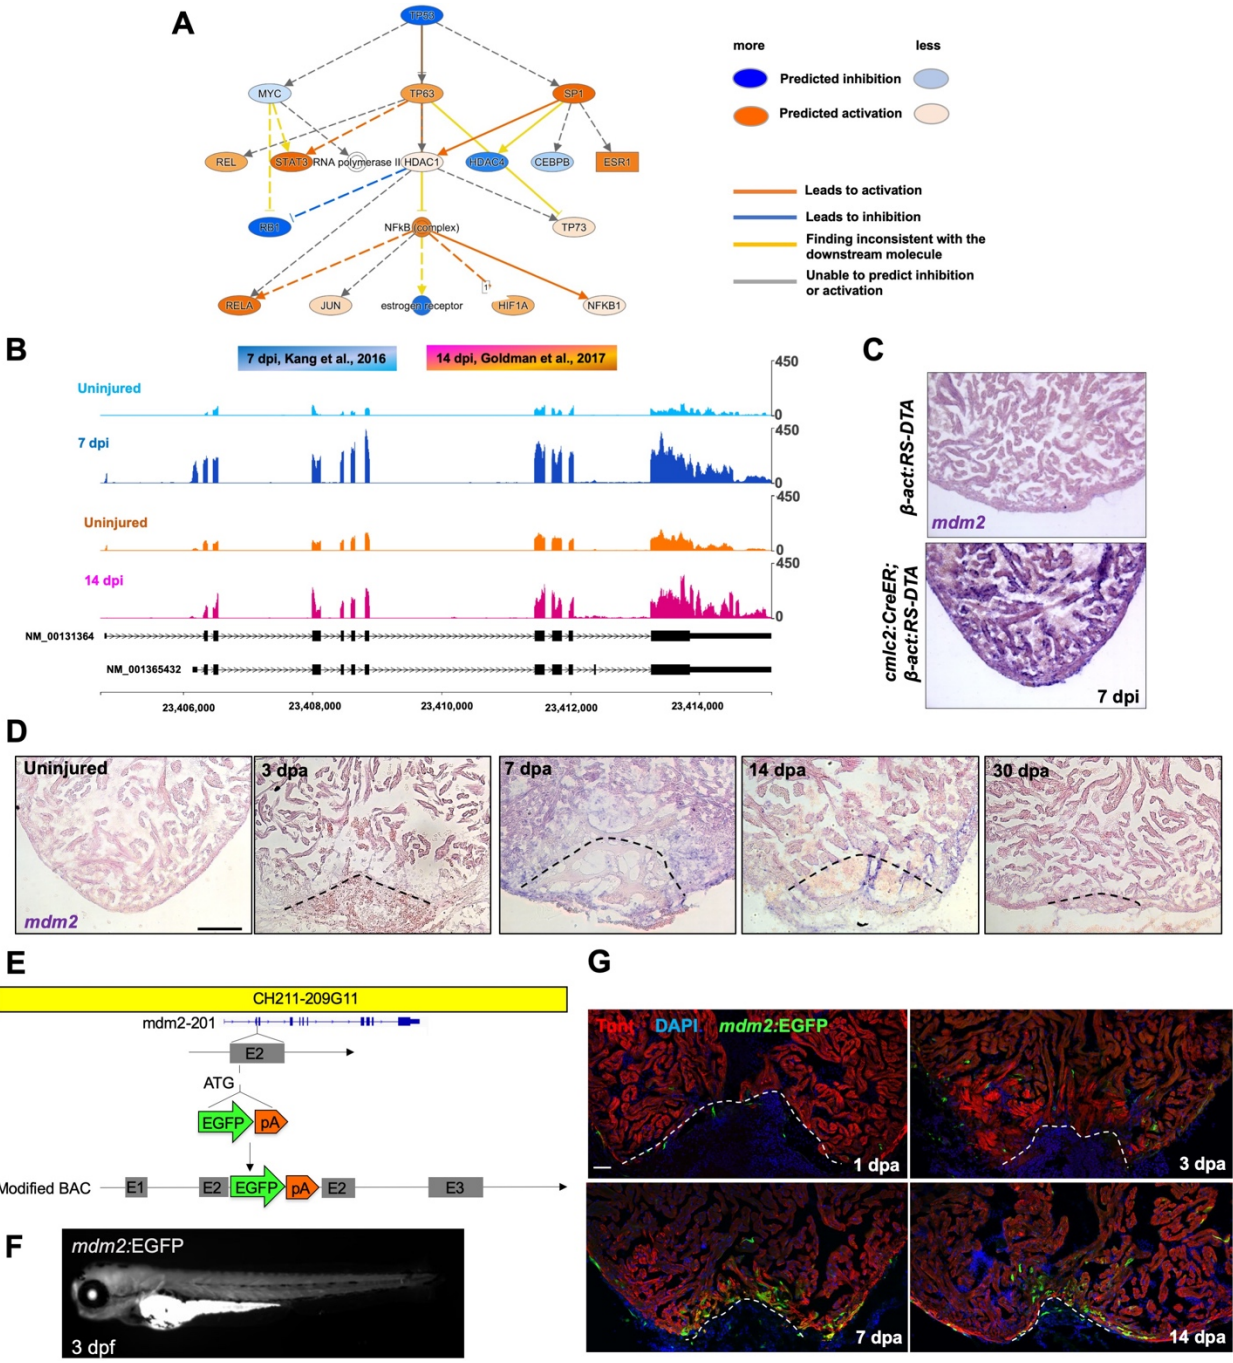

**Figure S1 (related to Figure 1). *mdm2* expression is induced after heart injury. (A)**

Analysis of transcriptome data of 7 dpi regenerating zebrafish published by Kang et al., 2016. Solid arrows indicate direct and dashed arrow indicates indirect interactions. Predictions on the direction and intensity of activation and inhibition by TP53 were made by IPA knowledgebase, based on published literature. **(B)** Genome browser tracks indicating expression of *mdm2* 7 days and 14 days after induced CM ablation (dpi), versus uninjured ventricles. **(C)** In situ hybridization for *mdm2* (violet) in sections of control (no CreER) and injured (7 dpi) ventricles, 7 days after tamoxifen administration. **(D)** In situ hybridization for *mdm2* in ventricular sections at different time points after resection of the ventricular apex (dpa). Dashed lines approximate the resection plane. Scale bars: 100  $\mu$ m. **(E)** Cartoon showing the *mdm2:EGFP* BAC transgene. **(F)** Larval *mdm2*-directed fluorescence, shown at 3 day post fertilization (dpf). **(G)** Images showing *mdm2*-directed EGFP at different time points after resection of the ventricular apex. Tnnt marks CMs. Dashed lines approximate resection plane. Scale bars: 100  $\mu$ m.

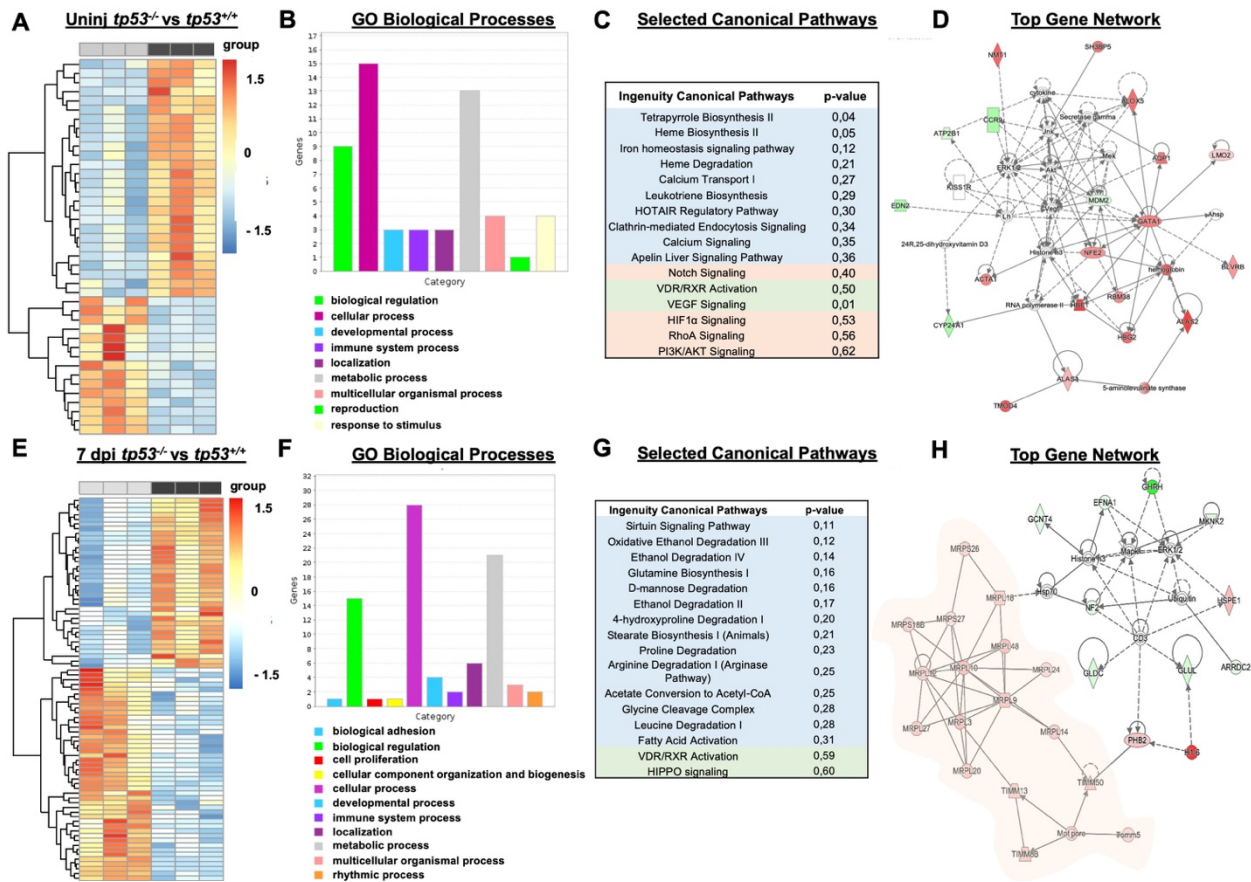

**Figure S2 (related to Figure 2). *tp53*<sup>+/+</sup> and *tp53*<sup>-/-</sup> transcriptomic data.** (A) Heatmap showing 42 genes differentially modulated in uninjured ventricles (Table S5). Black bars, *tp53*<sup>-/-</sup>. Grey bars, *tp53*<sup>+/+</sup>. (B, C) Barplot showing different biological processes assessed by GO analysis (B), and a list of selected differentially modulated canonical pathways assessed by Ingenuity Pathway Analysis (C; Table S7). (D) Top gene network composed by genes differentially modulated between uninjured *tp53*<sup>-/-</sup> and *tp53*<sup>+/+</sup> ventricles. (E) Heatmap showing 82 genes differentially modulated between *tp53*<sup>-/-</sup> and *tp53*<sup>+/+</sup> ventricles at 7 days after genetic CM ablation (Table S6). (F, G) Barplot showing different biological processes assessed by GO analysis (F), and a list of selected differentially modulated canonical pathways assessed by Ingenuity Pathway Analysis (G; Table S8). (H) Top gene network composed by genes differentially modulated in regenerating *tp53*<sup>-/-</sup> and *tp53*<sup>+/+</sup> ventricles.

**A**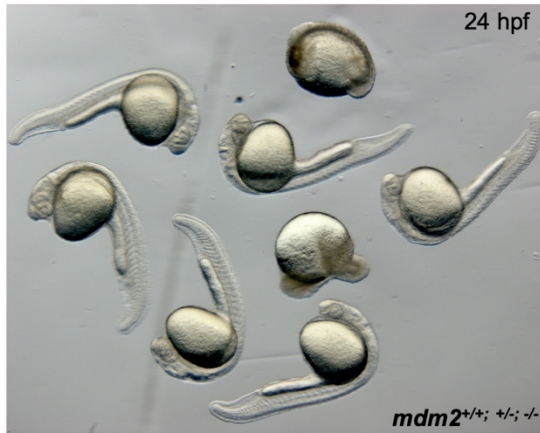**B**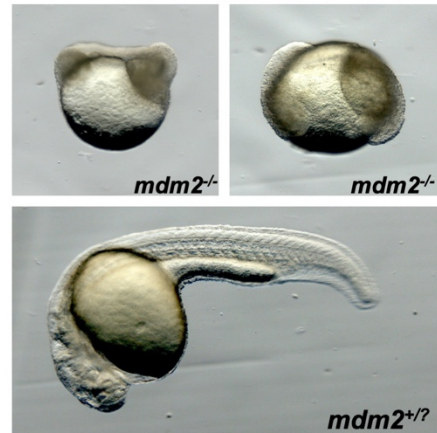**C**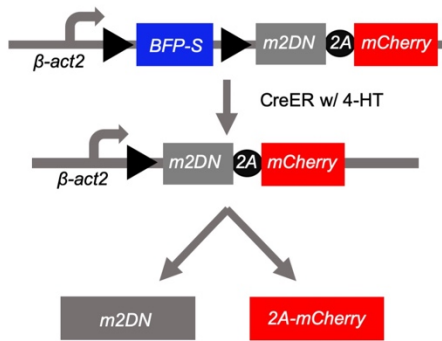**D**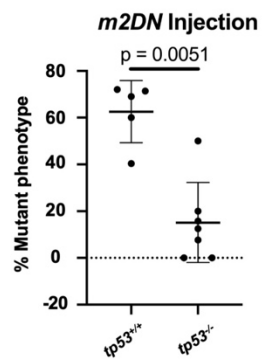**E**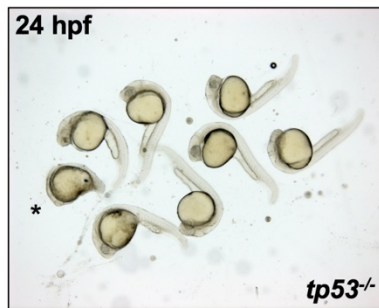**F**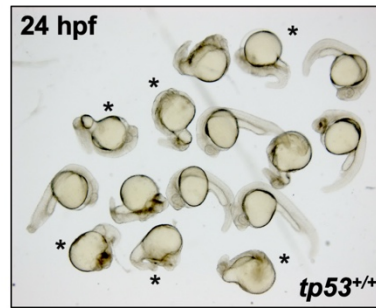

**Figure S3 (related to Figure 2). Effects of *mdm2* deletion mutations and *dn-mdm2* construct expression in zebrafish embryos. (A, B)** Images showing *mdm2*<sup>+/+</sup>, *mdm2*<sup>+/-</sup>, and *mdm2*<sup>-/-</sup> embryos from an *mdm2*<sup>+/-</sup> cross at 24 hours post fertilization (hpf). **(C)** Cartoon schematic of *β-act2:BSm2DN* transgene. Mutations within or loss of this Mdm2 critical domain have been demonstrated both to phenocopy and fail to rescue *mdm2* mutant mice or zebrafish. **(D)** Percentage of larvae recapitulating the *mdm2*<sup>-/-</sup> mutant phenotype upon injection of *m2DN* mRNA into single-cell embryos. This construct had limited effects in *tp53* mutant embryos. **(E, F)** Images showing *m2DN*-injected *tp53*<sup>-/-</sup> and *tp53*<sup>+/+</sup> larvae 24 hours post fertilization (24 hpf). Asterisks indicate embryos with gross morphological defects.

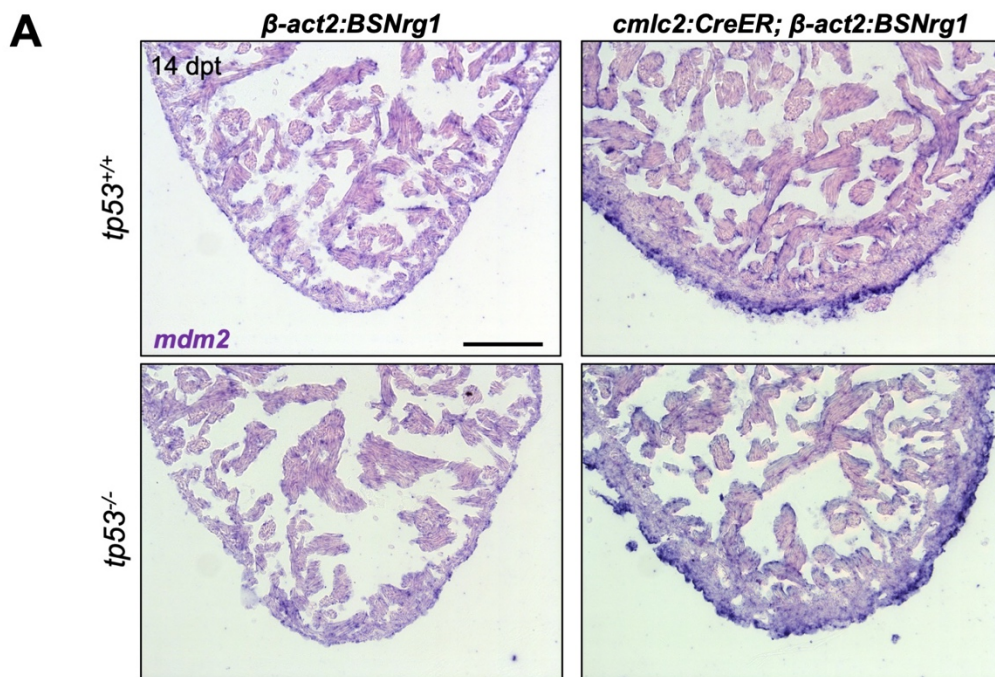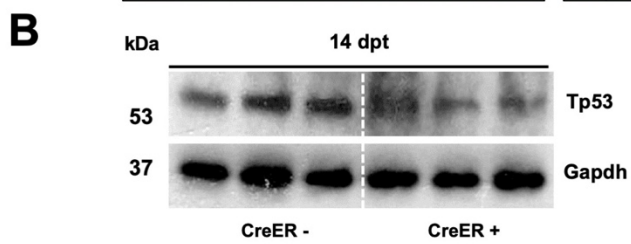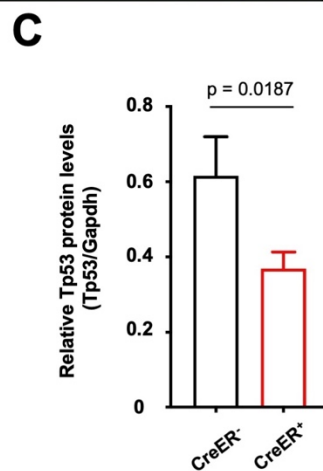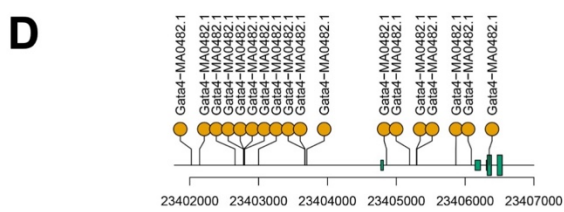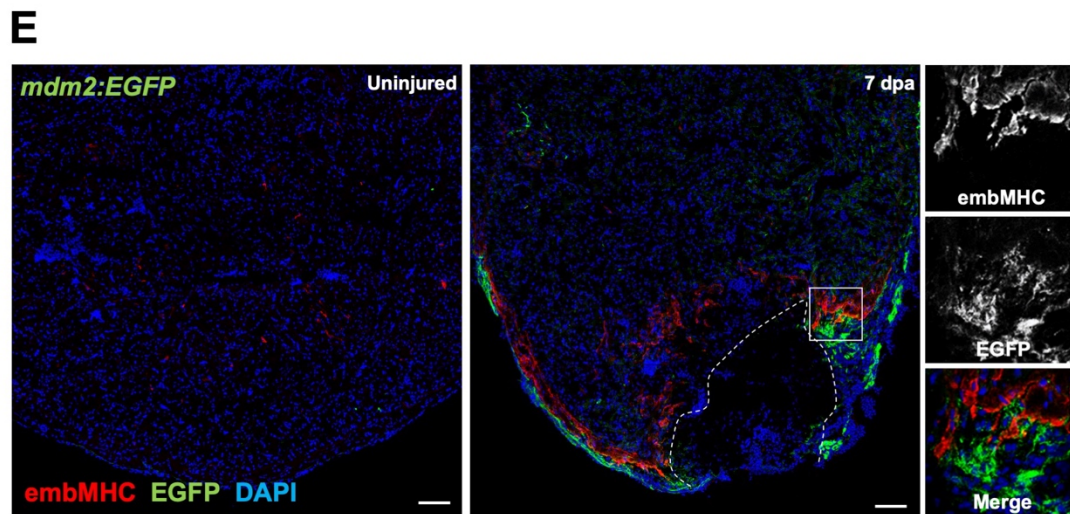



**Figure S4 (related to Figures 3 and 4). Modulation of Tp53 and *mdm2* in Nrg1-overexpressing hearts, and localization of embMHC with *mdm2*-directed fluorescence. (A)** In situ hybridization for *mdm2* on ventricular sections with (right) or without (left) Nrg1 overexpression in *tp53*<sup>+/+</sup> and *tp53*<sup>-/-</sup> animals. *mdm2* is similarly induced in both *tp53* genotypes, at the peripheral edge of cortical muscle. Scale bars: 100  $\mu$ m. **(B)** Western blot to detect Tp53, from control cardiac proteins and proteins extracted 14 days after Nrg1 induction. **(C)** Quantification of western blot protein bands. Eight to 10 hearts were pooled per sample. Data are represented as mean  $\pm$  SEM (unpaired t-test). **(D)** Schematic of the *mdm2* promoter region showing potential binding sites for the transcription factor Gata4. Region shown is from 3 kb upstream to 2,226 bp downstream of the *mdm2* transcriptional start site. **(E)** Immunofluorescence staining for EGFP and embMHC at 7 dpa indicates co-expression but not co-localization of the two markers. Dashed line indicates approximate injury plane. Right panels are high-mag views of box. Scale bars: 50  $\mu$ m.
