# Supplementary material for: Tp53 Suppression Promotes Cardiomyocyte Proliferation during Zebrafish Heart Regeneration
Source: PubMed Central journal article supplement — Cell Rep. Author manuscript; Available in PMC 2020 Sep 16. (PMC7494019; doi:10.1016/j.celrep.2020.108089), 2020-09-01
Supplement: NIHMS1627845-supplement-6.pdf [file NIHMS1627845-supplement-6.pdf]

## Tp53 Suppression Promotes Cardiomyocyte Proliferation during Zebrafish Heart Regeneration

### Graphical Abstract

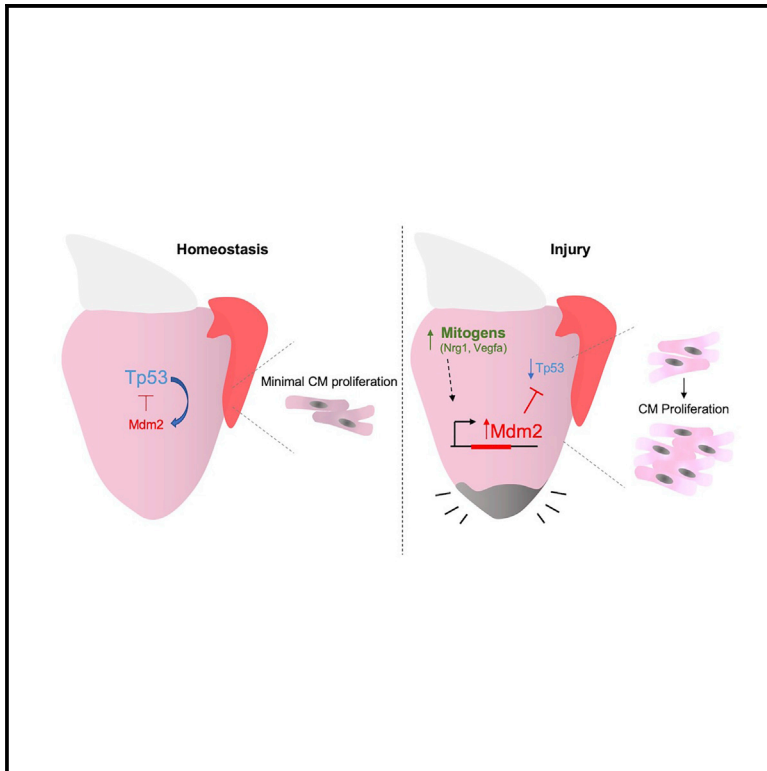

### Authors

Adam Shoffner, Valentina Cigliola, Nutishia Lee, Jianhong Ou, Kenneth D. Poss

### Correspondence

kenneth.poss@duke.edu

### In Brief

Zebrafish regenerate heart muscle by stimulating cardiomyocyte division. Shoffner et al. find that the Tp53 inhibitor Mdm2 is induced in cardiomyocytes by injury or experimental overexpression of cardiac mitogenic factors, suppressing the Tp53 network. *tp53* mutations enhance cardiomyocyte proliferation during regeneration, whereas myocardial blockade of Mdm2 has opposite effects.

### Highlights

- Tp53 network is transiently suppressed during zebrafish heart regeneration
- The Tp53 inhibitor *mdm2* is induced in regenerating cardiomyocytes
- Tp53 or Mdm2 modulation can impact injury-induced cardiomyocyte proliferation
- Mitogens can trigger *mdm2* expression and suppress Tp53 in the absence of injury

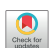

## Report

# Tp53 Suppression Promotes Cardiomyocyte Proliferation during Zebrafish Heart Regeneration

Adam Shoffner,<sup>1,2,3,4</sup> Valentina Cigliola,<sup>1,3,4</sup> Nutishia Lee,<sup>1,3</sup> Jianhong Ou,<sup>1,3</sup> and Kenneth D. Poss<sup>1,3,5,\*</sup><sup>1</sup>Regeneration Next, Duke University, Durham, NC 27710, USA<sup>2</sup>Department of Surgery, Duke University Medical Center, Durham, NC 27710, USA<sup>3</sup>Department of Cell Biology, Duke University Medical Center, Durham, NC 27710, USA<sup>4</sup>These authors contributed equally<sup>5</sup>Lead Contact\*Correspondence: [kenneth.poss@duke.edu](mailto:kenneth.poss@duke.edu)<https://doi.org/10.1016/j.celrep.2020.108089>

## SUMMARY

Zebrafish regenerate heart muscle through division of pre-existing cardiomyocytes. To discover underlying regulation, we assess transcriptome datasets for dynamic gene networks during heart regeneration and identify suppression of genes associated with the transcription factor Tp53. Cardiac damage leads to fluctuation of Tp53 protein levels, concomitant with induced expression of its central negative regulator, *mdm2*, in regenerating cardiomyocytes. Zebrafish lacking functional Tp53 display increased indicators of cardiomyocyte proliferation during regeneration, whereas transgenic Mdm2 blockade inhibits injury-induced cardiomyocyte proliferation. Induced myocardial overexpression of the mitogenic factors Nrg1 or Vegfaa in the absence of injury also upregulates *mdm2* and suppresses Tp53 levels, and *tp53* mutations augment the mitogenic effects of Nrg1. *mdm2* induction is spatiotemporally associated with markers of de-differentiation in injury and growth contexts, suggesting a broad role in cardiogenesis. Our findings reveal myocardial Tp53 suppression by mitogen-induced Mdm2 as a regulatory component of innate cardiac regeneration.

## INTRODUCTION

Myocardial infarction (MI), a result of impaired blood flow to the heart and subsequent death of cardiomyocytes (CMs), continues to cause significant morbidity and mortality (Go et al., 2013). Enhancing the ability of MI victims to regenerate lost CMs and restore cardiac function is a major focus within the field of regenerative medicine (Sadek and Olson, 2020).

By contrast with mammals, adult zebrafish possess a high capacity to regenerate damaged or lost cardiac tissue following injury, through proliferation of spared, injury-escaping CMs (Kikuchi et al., 2010; Poss et al., 2002). Recently, a number of factors have been found to boost adult zebrafish CM proliferation if experimentally modulated during regeneration (Gemberling et al., 2015; Han et al., 2019; Karra et al., 2018; Missinato et al., 2018; Wu et al., 2016; Zhao et al., 2019). A subset of these factors, including Neuregulin1 (Nrg1), Vascular endothelial growth factor a (Vegfa), and vitamin D analogs (Gemberling et al., 2015; Han et al., 2019; Karra et al., 2018), have mitogenic effects even in the absence of injury. How these factors in particular exert their effects can enlighten the field, as they possess capacity as single entities to jumpstart a complex process of cardiogenesis, angiogenesis, and epicardial expansion, all seemingly without influences such as cell death, abrupt changes in tissue tension, and inflammation.

The tumor suppressor gene *TP53*, discovered 40 years ago, is the most widely mutated gene in human cancers (Lane and Crawford, 1979; Mantovani et al., 2019). Tp53 is a highly conserved transcription factor with critical roles in a variety of cell processes including cell cycle regulation, DNA repair, apoptosis, and senescence (Belyi et al., 2010; Berghmans et al., 2005; Fridman and Lowe, 2003; Hafner et al., 2019; Kruiswijk et al., 2015; Vousden and Lu, 2002). In CMs, Tp53 has been implicated as a key regulator of the cardiac transcriptome, and increased Tp53 levels have been shown to be associated with cardiac hypertrophy and remodeling (Mak et al., 2017; Nomura et al., 2018). Tp53 levels are typically kept low under homeostatic conditions, primarily through the activity of an E3 ubiquitin ligase, Mdm2. When Mdm2 is bound to Tp53 via its N-terminal Tp53 binding domain, its C-terminal ligase ubiquitinates Tp53 and targets it for proteosomal degradation (Chua et al., 2015; Michael and Oren, 2003; Nomura et al., 2017). These interactions between Tp53 and Mdm2 have been implicated in maintaining cardiac homeostasis in mice (Stanley-Hasnain et al., 2017). Mdm2-Tp53 binding has also been shown to physically inhibit the transactivational domain of Tp53 (Oliner et al., 1993). Following a cellular insult like ionizing radiation exposure, Mdm2 is prevented from binding to Tp53, allowing its accumulation and activation of target genes (Guo et al., 2013; Wade et al., 2013). As molecular damage resolves, Tp53 acts as its own

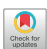

negative regulator in a complex that directly increases *mdm2* transcription (Berghmans et al., 2005; Chua et al., 2015; Pant et al., 2013). Additional, Tp53-independent roles for Mdm2 have been elucidated (Bohlman and Manfredi, 2014; Gu et al., 2009).

Here, a potential role of Tp53 during innate heart regeneration in zebrafish arose after bioinformatic assessment indicated that the network of Tp53-associated genes is suppressed during heart regeneration. We show evidence that this suppression is due to regulated induction of *mdm2*, which we observe in CMs during muscle regeneration as well as other cardiogenic events. Genetic reduction of Tp53 levels increased CM proliferation, either during heart regeneration or upon direct mitogen stimulation, whereas myocardial inhibition of Mdm2 decreased CM proliferation. Our experiments indicate that zebrafish heart regeneration is enabled by a mechanism in which injury-induced mitogens suppress Tp53.

## RESULTS

### Tp53 Protein Levels Transiently Decrease after Heart Injury

To uncover transcription factors that regulate gene expression during heart regeneration, we performed additional analyses of published RNA-sequencing (RNA-seq) datasets using Ingenuity Pathway Analysis (IPA) software, a curated database of literature-derived information on biological interactions. Comparisons were made between samples from hearts of uninjured zebrafish and those of zebrafish receiving a genetic ablation injury that destroys ~50% of all CMs (Kang et al., 2016; Krämer et al., 2014; Wang et al., 2011; Figures 1A, 1B, and S1A; Tables S1 and S2). In this injury model, CM death occurs uniformly throughout the heart over 5 to 7 days after incubation with tamoxifen (days post injury [dpi]); Wang et al., 2011). Thus, 7 dpi is considered an early post-injury stage and 14 dpi is more temporally removed from injury, with each time point displaying high indices of CM proliferation. The most significant activated upstream regulators included factors involved in inflammation, such as tumor necrosis factor (TNF) and interleukin-6 (IL6; Table S1). ErbB2 and Vegf signaling, known to impact CM proliferation (Bersell et al., 2009; D'Uva et al., 2015; Gemberling et al., 2015; Karra et al., 2018; Lai et al., 2017), were also found among the list of upstream regulators (Table S1). Several transcription factors were identified as possible suppressed upstream regulators (i.e., molecules whose suppression results in the observed gene expression changes), including KLF15 and RB1. Unexpectedly, among the most suppressed upstream regulators at 7 dpi was the downstream transcriptional network of Tp53 (Figures 1B and S1; Table S2). By 14 dpi, this was no longer the case (Table S2). To assess changes in Tp53 levels during heart regeneration, we performed western blotting on proteins isolated from whole hearts after CM ablation. Cardiac Tp53 levels trended as dynamic after injury, measuring on average at ~40% of uninjured levels at 7 dpi and recovering to levels greater than those of uninjured fish at 14 dpi (Figure 1C). Statistical tests reflected sample variability, but trends were consistent with the analyses of our transcriptome data and with a recent proteomics study assessing Tp53 levels by mass spectrometry after resection of the zebrafish ventricle (Ma et al., 2018).

Mdm2 is the primary regulator of Tp53. Based on our previously published transcriptome datasets, *mdm2* transcripts are increased at 7 and 14 dpi at 1.7- and 2.6-fold those of uninjured levels, respectively (Figure S2B; Goldman et al., 2017; Kang et al., 2016). To visualize these changes, we performed *in situ* hybridization (ISH) using injured and regenerating hearts. *mdm2* was rarely detectable in uninjured hearts. By contrast, increased *mdm2* expression was detected in the cortical muscle layer near the injury site at 7 days following resection of the ventricular apex (days post amputation [dpa]), although variable and sometimes difficult to detect (Figure 1D). *mdm2* expression remained detectable at 14 dpa but no longer by 30 dpa (Figure S2D). Additionally, induced genetic ablation of CMs led to *mdm2* expression throughout the ventricular wall and trabecular compartment by 7 dpi (Figure S2C).

To more clearly define the spatiotemporal pattern of *mdm2* expression during heart regeneration, we generated a BAC transgenic reporter line containing long sequence stretches upstream (80 kb) and downstream (122 kb) of the *mdm2* start codon and flanking an enhanced green fluorescent protein (EGFP) cassette (*TgBAC[mdm2:EGFP<sup>pd312</sup>]*, hereafter referred to as *mdm2:EGFP*; Figure S2E). As expected, based on the known requirement for Mdm2 during development (Chua et al., 2015), *mdm2:EGFP* fluorescence was evident throughout the entire bodies of developing larvae by 3 days post fertilization (dpf; Figure S2F). Adult *mdm2:EGFP* fish hearts displayed low or undetectable EGFP expression in the absence of injury, but EGFP fluorescence was sharply increased in both compact and trabecular muscle near the injury site upon ventricular resection at 7 and 14 dpa (Figures 1G and S2G). Thus, Tp53 levels, and ostensibly the expression of its direct and indirect target genes, are transiently suppressed during heart regeneration, concomitant with transcriptional induction of the Mdm2 negative regulator.

### Genetic Modulation of Tp53 Controls CM Proliferation during Heart Regeneration

To investigate the function of Tp53 during regeneration, we resected the ventricular apices of zebrafish with null mutations in *tp53* (*tp53<sup>M214K</sup>*) and quantified CM proliferation indices at 7 dpa (Berghmans et al., 2005). *tp53<sup>M214K</sup>* mutants showed a more than doubling (123%) increase in their average CM proliferation index ( $n = 8, 9$ ; Figures 2A–2C). Transcriptome sequencing of uninjured and regenerating *tp53<sup>M214K</sup>* hearts revealed significant expression changes from wild types in a relatively small number of genes, 42 and 82, respectively, which represent a variety of cellular processes as characterized by gene ontology terms and IPA (Figure S2; Tables S3 and S4). These data suggest a function for Tp53 in restricting CM proliferation during regeneration.

To increase Tp53 activity in heart muscle, we generated a transgenic line to express an Mdm2 isoform lacking its C-terminal ubiquitin ligase and shown to have dominant-negative activity in previous studies (Chua et al., 2015; Jones et al., 1995). We placed this *m2DN* cassette downstream of an actin promoter and a *loxP*-flanked fluorescent reporter gene and stop signal (*Tg[ $\beta$ -actin2:loxP-BFP-STOP-loxP-dnMdm2-2A-mCherry]<sup>pd313</sup>*, hereafter referred to as  $\beta$ -act2:BS-*m2DN*). Published homozygous *mdm2* mutants are embryonic lethal (Chua et al., 2015),

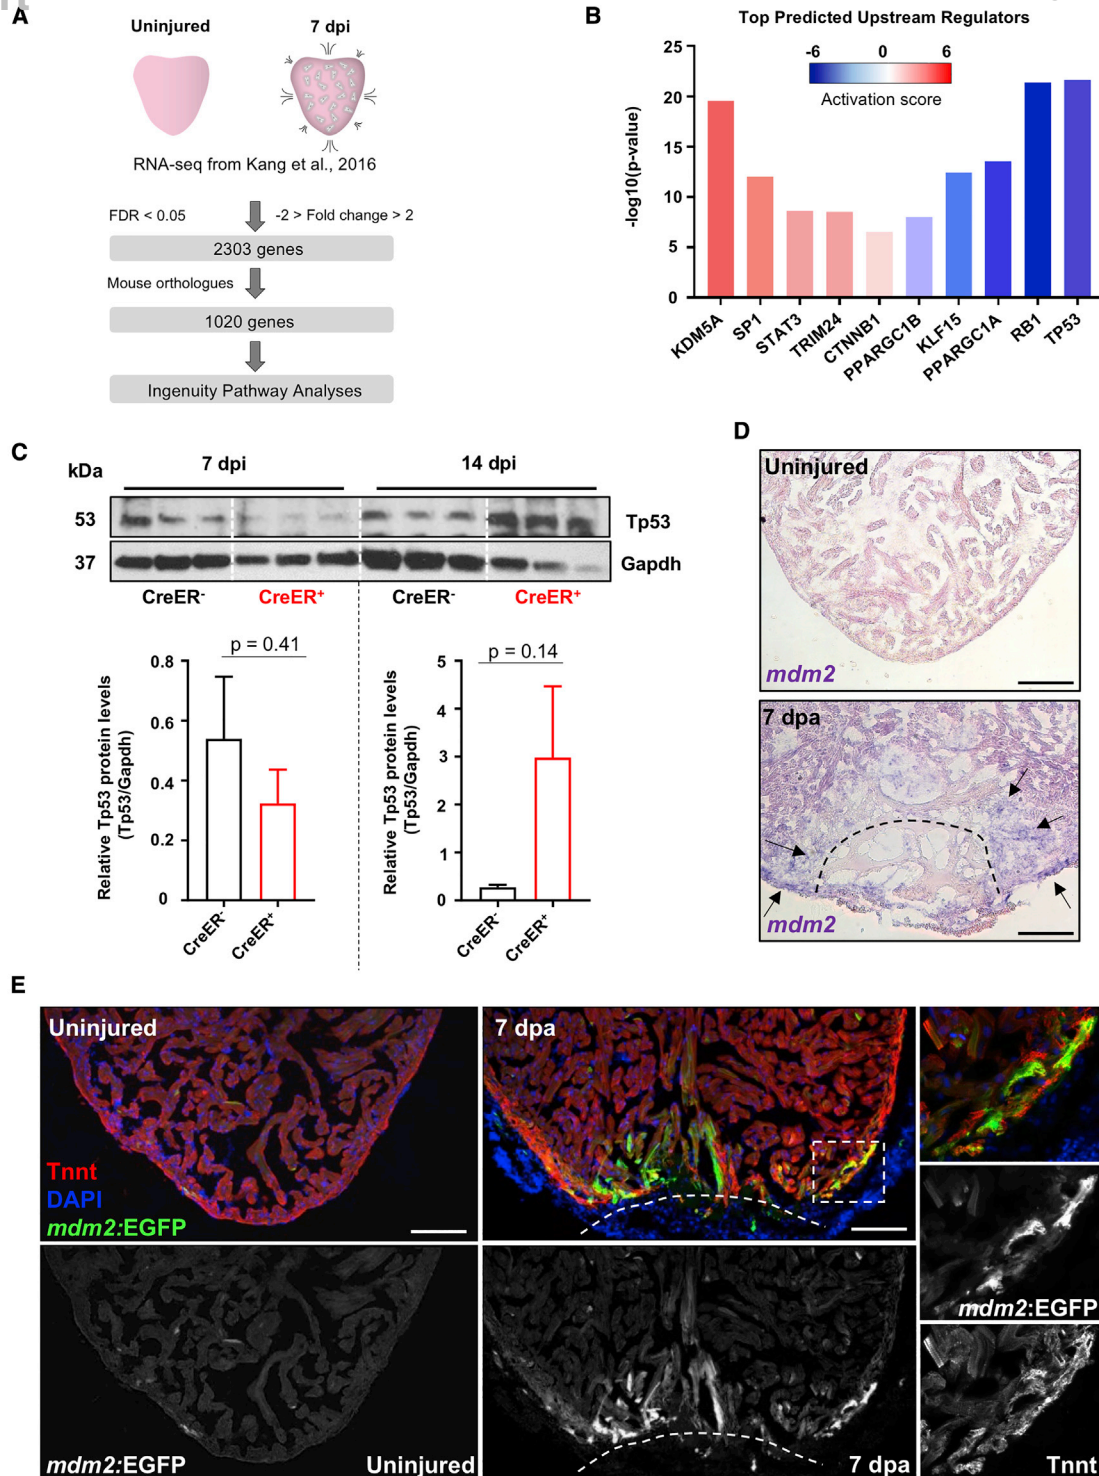

**Figure 1. Zebrafish *Tp53* and *mdm2* Expression Are Dynamic upon Heart Injury**

(A) Experimental design and bioinformatical data analysis.

(B) Selected top transcription factors acting as upstream regulators of differentially expressed genes in adult hearts 7 days after initiation (dpi) of CM ablation.

(C) Western blot on protein extract of control ( $\beta$ -actin2:*loxP*-*mCherry*-*STOP*-*loxP*-*DTA*<sup>pd36</sup>), 7 dpi and 14 dpi (*cmhc2:CreER*;  $\beta$ -actin2:*loxP*-*mCherry*-*STOP*-*loxP*-*DTA*<sup>pd36</sup>) ventricles, with quantification of *Tp53* protein. n = 8–10 pooled hearts per sample. Data show mean  $\pm$  SEM (unpaired t test).

(D) ISH for *mdm2* expression (violet) in sections of uninjured and 7 days after resection (dpa) ventricles. Arrows identify sites of increased *mdm2* expression following ventricle amputation.

(E) Section images of uninjured and 7 dpa *mdm2:EGFP* hearts. “Tnnt” marks CMs. Boxes correspond to the region magnified in the right panels. Scale bars: 100  $\mu$ m.

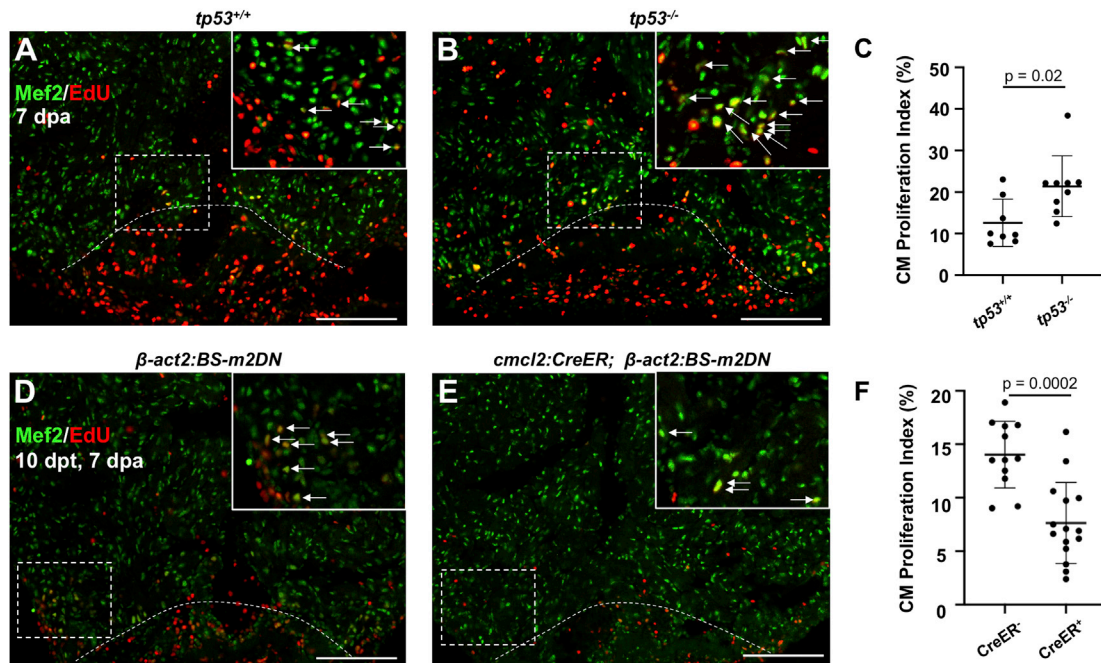

**Figure 2. Tp53 or Mdm2 Modulation Alters CM Proliferation during Heart Regeneration**

(A and B) Images of *tp53*<sup>+/+</sup> and *tp53*<sup>-/-</sup> hearts at 7 days post ventricular apex (dpa) resection. Arrows indicate Mef2<sup>+</sup>/EdU<sup>+</sup> nuclei. (C) Quantification of CM proliferation at 7 dpa indicating an increased proliferation index in *tp53*<sup>-/-</sup> mutants. n = 8 and 9 for *tp53*<sup>+/+</sup> and *tp53*<sup>-/-</sup>, respectively. (D and E) Images of *β-act2:BS-m2DN* and *cmc12:CreER; β-act2:BS-m2DN* hearts at 7 dpa and 10 days post tamoxifen (dpt) administration. Arrows indicate Mef2<sup>+</sup>/PCNA<sup>+</sup> nuclei. (F) Quantification of CM proliferation showing a reduction in the proliferation index animals expressing a dominant-negative Mdm2. n = 12 and n = 15 for CreER<sup>-</sup> and CreER<sup>+</sup>, respectively. Scale bars: 100 μm. Data show mean ± SEM (Mann-Whitney U test).

as were new *mdm2*<sup>pd314</sup> mutants that we generated by CRISPR-based deletion, with no larvae surviving past 1 dpf (Figure S3). To evaluate the effects of inhibiting Mdm2 function on CM proliferation, we crossed *β-act2:BS-m2DN* with *cmc12:CreER* fish, for 4-Hydroxytamoxifen (4-HT)-inducible, Cre-mediated release of m2DN expression in CMs (Figures 2D–2F and S3C). Adult *cmc12:CreER; β-act2:BS-m2DN* and *β-act2:BS-m2DN* control clutchmates were treated with 4-HT 3 days before ventricular resection. *cmc12:CreER; β-act2:BS-m2DN* animals demonstrated a ~50% reduction in CM proliferation at 7 dpa compared to controls (n = 12, 15; Figures 2D–2F). Together, these data indicate that suppression of Tp53-mediated gene regulation, at least in part by programmed induction of Mdm2, boosts CM proliferation upon cardiac injury in zebrafish.

### CM Mitogens Trigger *mdm2* Induction

Cardiac damage is a massive biologic insult, resulting in a constellation of cellular events including and not limited to inflammation, fibrinogenesis, angiogenesis, muscle de-differentiation, CM proliferation, and muscle patterning (González-Rosa et al., 2017; Sadek and Olson, 2020; Tzahor and Poss, 2017; Vujic et al., 2020). Previously, we reported that the extracellular factor Nrg1 causes overt CM proliferation when ectopically expressed in the adult heart (Gemberling et al., 2015). In this way, adult cardiogenesis is uncoupled from injury, enabling assessment of the impact of the mitogenic signal itself. To determine effects of Nrg1 overex-

pression on expression of *mdm2*, we first performed ISH on *cmc12:CreER; β-act2:BSNrg1* fish 14 days after induction of the *nrg1* transgene. Whereas *mdm2* was undetectable in control hearts as described above, *nrg1* overexpression for 14 days led to strong and consistent *mdm2* expression in CMs within the cortical wall by ISH (Figure S4A). Similarly, when the *mdm2:EGFP* transgene was crossed into the *cmc12:CreER; β-act2:BSNrg1* background, 14 days of *nrg1* overexpression strongly induced EGFP throughout the cortical layer (Figure 3A).

*Tp53* and *Mdm2* are part of an autoregulatory feedback loop, conserved in zebrafish, with Tp53 binding to an upstream regulatory element of *mdm2* to activate transcription (Berghmans et al., 2005; Pant et al., 2013). To test whether *mdm2* induction with mitogenic stimulation reflects this mechanism of regulation, we first quantified proteins isolated from *cmc12:CreER; β-act2:BSNrg1* hearts and controls, finding that Tp53 protein levels were reduced upon 14 days of ectopic Nrg1 expression (Figures S4B and S4C). We then performed *mdm2* ISH using *cmc12:CreER; β-act2:BSNrg1; tp53*<sup>M214K</sup> mutant zebrafish. As in wild-type zebrafish, ectopic Nrg1 expression increased *mdm2* transcript levels throughout the outer cortical muscle layer in the presence or absence of functional Tp53 (Figure S4A; Berghmans et al., 2005). Taken together, these results suggest that mitogen stimulation induces *mdm2* in a Tp53-independent fashion.

To examine effects of a second CM mitogen, we experimentally induced myocardial Vegfa overexpression, which

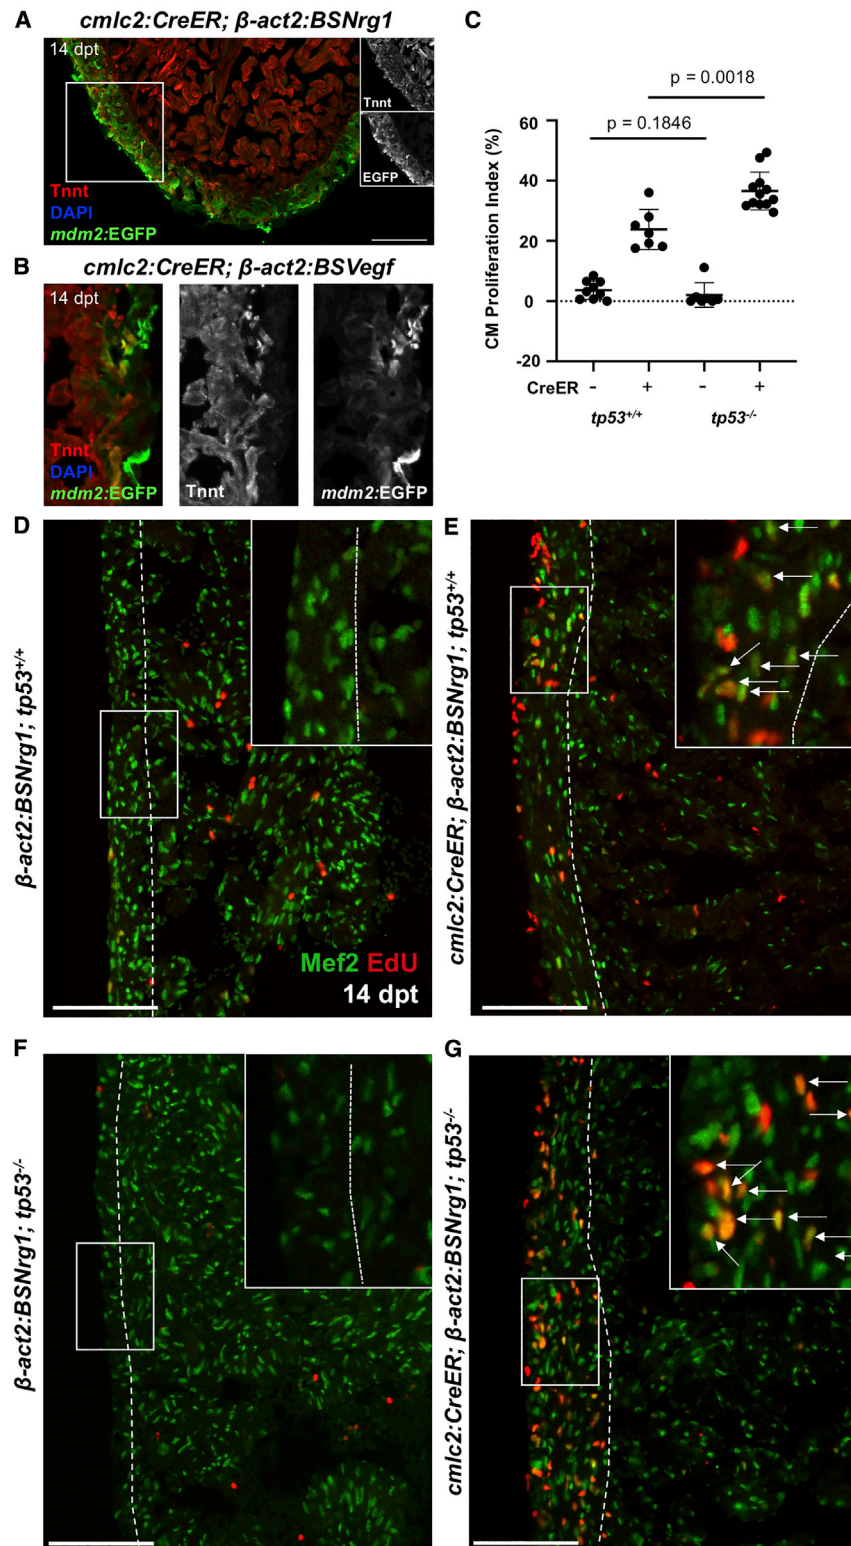

**Figure 3. Mitogens Activate *mdm2* Regulatory Sequences and Have Increased Potency in *tp53*<sup>-/-</sup> Mutants**

(A and B) *mdm2:EGFP* expression is activated in the ventricular wall after induced *nrg1* (A) or *vegfaa* (B) overexpression (dpt, days post tamoxifen administration). High-magnification views only shown in (B). (C) Quantification of CM EdU incorporation indices in ventricular walls of control (CreER<sup>-</sup>) or *nrg1*-overexpressing hearts at 14 dpt in *tp53*<sup>+/+</sup> and *tp53*<sup>-/-</sup> backgrounds.  $n = 9$  and  $n = 7$  for *tp53*<sup>+/+</sup> CreER<sup>-</sup> and CreER<sup>+</sup>, respectively.  $n = 7$  and  $n = 12$  for *tp53*<sup>-/-</sup> CreER<sup>-</sup> and CreER<sup>+</sup>, respectively. (D–G) Section images of ventricular walls from groups in (C), indicating greater *Nrg1*-induced EdU incorporation in Mef2<sup>+</sup> cells in *tp53*<sup>-/-</sup> ventricles. Boxes correspond to the region magnified in adjacent panels. Arrows indicate Mef2<sup>+</sup>EdU<sup>+</sup> cells CMs. Scale bars: 100  $\mu$ m. Data show mean  $\pm$  SEM (Mann–Whitney U test).

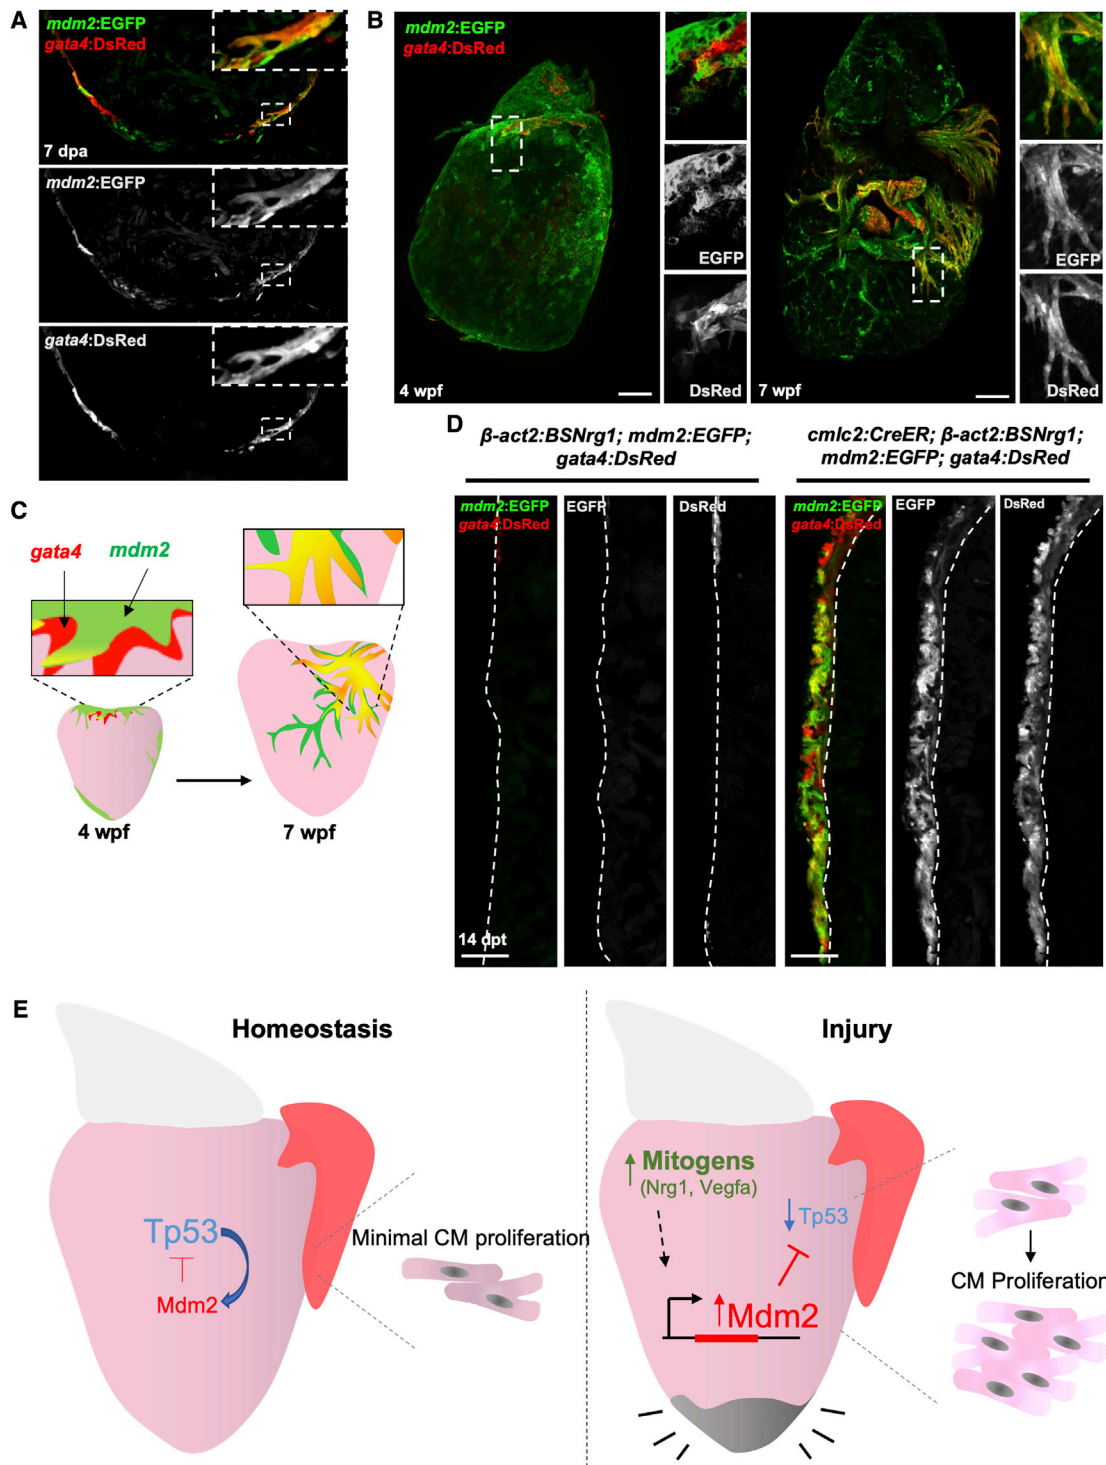

**Figure 4. *mdm2* Induction Is Associated with Highly Cardiogenic Areas during Heart Development and Regeneration**

(A) Section confocal images of 7-dpa regenerating ventricles indicating co-localization of *gata4*- and *mdm2*-directed fluorescent reporter proteins. Boxes correspond to the region magnified in the panels.

(B) Whole mount images of juvenile hearts at 4 and 7 weeks post fertilization (wpf) showing *gata4*- and *mdm2*-directed fluorescence at the ventricular base at 4 wpf, and expanding on the surface muscle by 7 wpf.

(C) Cartoon showing co-localization of *mdm2* and *gata4* domains in emerging and proliferating CMs of the juvenile cortical wall.

(legend continued on next page)

hypervascularizes the adult zebrafish heart in the absence of injury but also has mitogenic effects on CMs (Karra et al., 2018). Visualization of EGFP in *cm1c2:CreER*,  $\beta$ -act2:BSVegfa, and *mdm2:EGFP* hearts revealed analogous findings as with *nrg1* overexpression, with *mdm2:EGFP* fluorescence activated in areas of proliferating CMs (Figure 3B). Thus, two independent mitogens, having unique receptors and presumed mechanisms, lead cascades that trigger activation of myocardial transcription of *mdm2* in the absence of injury.

To determine whether presence of Tp53 functionally impacts mitogen-stimulated CM proliferation, we crossed *cm1c2:CreER*;  $\beta$ -act2:BSNrg1 transgenes into the *tp53*<sup>M214K</sup> background. We found that, whereas 14 days of induced *nrg1* overexpression sharply increased the cortical CM proliferation index in wild-type animals from baseline levels to ~24%, the index in *tp53*<sup>M214K</sup> animals was ~37%, representing a ~54% higher level (n = 7, 12; Figures 3C–3G). Together, these findings indicate that mitogen presence, either experimentally expressed or injury-induced, induces *mdm2* and suppresses the Tp53 signaling network, and that this suppression of Tp53 has the effect of boosting CM proliferation.

### ***mdm2* Regulation Occurs in Multiple Cardiogenic Contexts**

Activation of regulatory sequences for the cardiogenic transcription factor gene *gata4* is a visual marker for de-differentiated muscle in zebrafish (Kikuchi et al., 2010). *gata4* activation also marks an emergent population of juvenile CMs from which the cortical muscle of the adult ventricular wall is derived (Gupta et al., 2013; Gupta and Poss, 2012), as well as CMs stimulated to proliferate upon transgenic Nrg1 stimulation (Gemberling et al., 2015). Sequence analysis revealed multiple predicted GATA4 binding sites in the *mdm2* promoter region (Figure S4D). To determine if *mdm2* induction is a general feature of highly cardiogenic tissue in zebrafish, we assessed co-localization between *mdm2*- and *gata4*-directed fluorescence in several contexts. We found that *mdm2*-directed EGFP fluorescence closely co-localized with *gata4*-directed dsRed fluorescence after ventricular resection injury (Figure 4A). *mdm2:EGFP* was also expressed in the same region as the form of myosin heavy chain that is prominent in embryonic heart muscle but diminished in adults upon resection (Sallin et al., 2015), but they were expressed in adjacent CMs and did not colocalize to the same expressing cells (Figure S4E). Moreover, *mdm2*-directed fluorescence was consistently present in a small domain at the base of the juvenile 4 weeks post fertilization (wpf) ventricle that partially overlaps with *gata4*-directed fluorescence. By 7 wpf, *mdm2*-directed EGFP fluorescence was evident in emerging and expanding cortical *gata4*<sup>+</sup> CMs (Figures 4B and 4C). In addition, *mdm2*- and *gata4*-directed fluorescence were tightly co-localized in adult *cm1c2:CreER*;  $\beta$ -act2:BSNrg1; *mdm2:EGFP*; *gata4:dsRed* fish after 14 days of *nrg1* overexpression (Figure 4D). These findings suggest a broad role for Tp53 suppression and *mdm2* induction during particularly active cardiogenesis.

### **DISCUSSION**

Here we report transient Tp53 suppression as a regulatory event that underlies and contributes to the strong cardiac regenerative response of adult zebrafish. Our findings indicate a mechanism in which mitogens present in injury sites activate myocardial expression of the negative Tp53 regulator Mdm2, which transiently reduces Tp53 levels and facilitates cell cycle entry (Figure 4E).

Tp53 has been implicated in other settings relevant to heart regeneration, most notably salamander limb regeneration (Yun et al., 2013). During limb regeneration, Tp53 protein levels are transiently suppressed early as the regeneration blastema forms, before recovering as new tissue is patterned. Moreover, modulation of Tp53 activity reduced the ability of limb cells to form a blastema and differentiate properly, with the authors proposing that Tp53 suppression helps post-mitotic limb cells re-enter the cell cycle (Yun et al., 2013). A direct relationship between Tp53 levels and cellular differentiation was also reported in the context of cellular reprogramming, when *Tp53* mutant mouse fibroblasts showed increased capacity to undergo conversion to pluripotent cells (Hong et al., 2009; Kawamura et al., 2009; Li et al., 2009; Marión et al., 2009; Utikal et al., 2009). Furthermore, human somatic cells more readily undergo reprogramming upon acquisition of mutations in *TP53* (Merkle et al., 2017). Our findings parallel these findings, as Tp53 suppression marked by *mdm2* expression closely associates with markers of CM de-differentiation and division after injury. Thus, evidence is building toward a model in which Tp53 suppression broadly promotes de-differentiation across species and contexts.

Many potential regulators of Tp53 expression or activity exist in cardiac injury sites, including macromolecular damage, inflammation, and hypoxia. Each stimulus would be predicted to increase Tp53 levels and promote cell cycle arrest or apoptosis (Helton and Chen, 2007; Muñoz-Fontela et al., 2016; Williams and Schumacher, 2016). We speculate that an innate ability to counter this effect and reduce Tp53 impact, for instance by enhancing Mdm2 presence in response to injury, can facilitate division of source cells to an extent that it outcompetes scarring. Importantly, however, while injury itself might constitute a regulatory influence on Tp53 levels, we also show that mitogens can induce *mdm2* expression and repress the Tp53 network. In fact, assessment of multiple cardiogenic contexts revealed *mdm2* expression spatiotemporally localized with the areas of most active cardiogenesis. Mdm2 has pro-oncogenic effects that include Tp53 regulation but also other mechanisms (Marine and Lozano, 2010), and it is possible that induction of *mdm2* expression and the suppression of its targets that facilitate de-differentiation during heart or limb regeneration are vestiges of the regulation that supports mammalian tumorigenic de-differentiation and cell division. Illuminating how *mdm2* expression is regulated at the transcriptional level upon cardiac injury or mitogen stimulation can help resolve how key regenerative events like de-differentiation occur naturally without the threat of tumorigenesis.

(D) *mdm2:EGFP* and *gata4:DsRed* fluorescence are activated and co-localized in the ventricular walls of *cm1c2:CreER*;  $\beta$ -act2:BSNrg1 (right) ventricles by 14 days of tamoxifen-induced overexpression. Controls (without the *cm1c2:CreER* transgene) are shown at left. Dashed lines delineate cortical from trabecular muscle. Scale bars: 100  $\mu$ m.

(E) Model of Mdm2-Tp53 regulation and its impact on CM proliferation after cardiac injury.



Our findings along with those of others suggest that Tp53 occupies an important position in the transition of cell differentiation states, where it can play a crucial role during innate regeneration. As suppression of Tp53 can augment CM proliferation following injury or growth factor stimulation, we speculate that applications to safely and transiently reduce Tp53 network activity in CMs of MI patients might help provoke clinically significant regeneration.

## STAR★METHODS

Detailed methods are provided in the online version of this paper and include the following:

- KEY RESOURCES TABLE
- RESOURCE AVAILABILITY
  - Lead Contact
  - Materials Availability
  - Data and Code Availability
- EXPERIMENTAL MODEL AND SUBJECT DETAILS
- METHOD DETAILS
  - Ingenuity pathway and gene ontology analyses
  - RNA extraction and sequencing
  - Western blotting
  - Generation of transgenic zebrafish
  - Histological analysis and imaging
  - mdm2 mRNA injections
- QUANTIFICATION AND STATISTICAL ANALYSIS

## SUPPLEMENTAL INFORMATION

Supplemental Information can be found online at <https://doi.org/10.1016/j.celrep.2020.108089>.

## ACKNOWLEDGMENTS

We thank Duke Zebrafish Shared Resource staff for zebrafish care. V.C. is supported by a SNSF Postdoctoral Fellowship. K.D.P. acknowledges research support from NHLBI (R35 HL150713), AHA, and Fondation Leducq.

## AUTHOR CONTRIBUTIONS

A.S. generated transgenic zebrafish lines; A.S., V.C., and N.L. performed experiments; A.S., V.C., and K.D.P. designed experimental strategy and wrote the manuscript; all authors analyzed data and contributed to the manuscript.

## DECLARATION OF INTERESTS

The authors declare no competing interests.

Received: April 20, 2020

Revised: July 6, 2020

Accepted: August 7, 2020

Published: September 1, 2020

## REFERENCES

Belyi, V.A., Ak, P., Markert, E., Wang, H., Hu, W., Puzio-Kuter, A., and Levine, A.J. (2010). The origins and evolution of the p53 family of genes. *Cold Spring Harb. Perspect. Biol.* 2, a001198.

Berghmans, S., Murphey, R.D., Wienholds, E., Neubergh, D., Kutok, J.L., Fletcher, C.D., Morris, J.P., Liu, T.X., Schulte-Merker, S., Kanki, J.P., et al.

(2005). tp53 mutant zebrafish develop malignant peripheral nerve sheath tumors. *Proc. Natl. Acad. Sci. USA* 102, 407–412.

Bersell, K., Arab, S., Haring, B., and Kühn, B. (2009). Neuregulin1/ErbB4 signaling induces cardiomyocyte proliferation and repair of heart injury. *Cell* 138, 257–270.

Bohlan, S., and Manfredi, J.J. (2014). p53-independent effects of Mdm2. *Subcell. Biochem.* 85, 235–246.

Chua, J.S., Liew, H.P., Guo, L., and Lane, D.P. (2015). Tumor-specific signaling to p53 is mimicked by Mdm2 inactivation in zebrafish: insights from mdm2 and mdm4 mutant zebrafish. *Oncogene* 34, 5933–5941.

D’Uva, G., Aharonov, A., Lauriola, M., Kain, D., Yahalom-Ronen, Y., Carvalho, S., Weisinger, K., Bassat, E., Rajchman, D., Yifa, O., et al. (2015). ERBB2 triggers mammalian heart regeneration by promoting cardiomyocyte dedifferentiation and proliferation. *Nat. Cell Biol.* 17, 627–638.

Davarinejad, H. (2017). Quantifications of western blots with ImageJ. <http://www.yorku.ca/yisheng/Internal/Protocols/ImageJ.pdf>.

Fridman, J.S., and Lowe, S.W. (2003). Control of apoptosis by p53. *Oncogene* 22, 9030–9040.

Gemberling, M., Karra, R., Dickson, A.L., and Poss, K.D. (2015). Nrg1 is an injury-induced cardiomyocyte mitogen for the endogenous heart regeneration program in zebrafish. *eLife* 4, e05871.

Go, A.S., Mozaffarian, D., Roger, V.L., Benjamin, E.J., Berry, J.D., Borden, W.B., Bravata, D.M., Dai, S., Ford, E.S., Fox, C.S., et al.; American Heart Association Statistics Committee and Stroke Statistics Subcommittee (2013). Executive summary: heart disease and stroke statistics—2013 update: a report from the American Heart Association. *Circulation* 127, 143–152.

Goldman, J.A., Kuzu, G., Lee, N., Karasik, J., Gemberling, M., Foglia, M.J., Karra, R., Dickson, A.L., Sun, F., Tolstorukov, M.Y., and Poss, K.K. (2017). Resolving heart regeneration by replacement histone profiling. *Dev. Cell* 40, 392–404 e395.

González-Rosa, J.M., Burns, C.E., and Burns, C.G. (2017). Zebrafish heart regeneration: 15 years of discoveries. *Regeneration (Oxf.)* 4, 105–123.

Gu, L., Zhu, N., Zhang, H., Durden, D.L., Feng, Y., and Zhou, M. (2009). Regulation of XIAP translation and induction by MDM2 following irradiation. *Cancer Cell* 15, 363–375.

Guo, L., Liew, H.P., Camus, S., Goh, A.M., Chee, L.L., Lunny, D.P., Lane, E.B., and Lane, D.P. (2013). Ionizing radiation induces a dramatic persistence of p53 protein accumulation and DNA damage signaling in mutant p53 zebrafish. *Oncogene* 32, 4009–4016.

Gupta, V., and Poss, K.D. (2012). Clonally dominant cardiomyocytes direct heart morphogenesis. *Nature* 484, 479–484.

Gupta, V., Gemberling, M., Karra, R., Rosenfeld, G.E., Evans, T., and Poss, K.D. (2013). An injury-responsive gata4 program shapes the zebrafish cardiac ventricle. *Curr. Biol.* 23, 1221–1227.

Hafner, A., Bulyk, M.L., Jambhekar, A., and Lahav, G. (2019). The multiple mechanisms that regulate p53 activity and cell fate. *Nat. Rev. Mol. Cell Biol.* 20, 199–210.

Han, Y., Chen, A., Umansky, K.B., Oonk, K.A., Choi, W.Y., Dickson, A.L., Ou, J., Cigliola, V., Yifa, O., Cao, J., et al. (2019). Vitamin D stimulates cardiomyocyte proliferation and controls organ size and regeneration in zebrafish. *Dev. Cell* 48, 853–863 e855.

Heicklen-Klein, A., and Evans, T. (2004). T-box binding sites are required for activity of a cardiac GATA-4 enhancer. *Dev. Biol.* 267, 490–504.

Helton, E.S., and Chen, X. (2007). p53 modulation of the DNA damage response. *J. Cell. Biochem.* 100, 883–896.

Hong, H., Takahashi, K., Ichisaka, T., Aoi, T., Kanagawa, O., Nakagawa, M., Okita, K., and Yamanaka, S. (2009). Suppression of induced pluripotent stem cell generation by the p53-p21 pathway. *Nature* 460, 1132–1135.

Jones, S.N., Roe, A.E., Donehower, L.A., and Bradley, A. (1995). Rescue of embryonic lethality in Mdm2-deficient mice by absence of p53. *Nature* 378, 206–208.

- Kang, J., Hu, J., Karra, R., Dickson, A.L., Tornini, V.A., Nachtrab, G., Gemberling, M., Goldman, J.A., Black, B.L., and Poss, K.D. (2016). Modulation of tissue repair by regeneration enhancer elements. *Nature* 532, 201–206.
- Karra, R., Knecht, A.K., Kikuchi, K., and Poss, K.D. (2015). Myocardial NF- $\kappa$ B activation is essential for zebrafish heart regeneration. *Proc. Natl. Acad. Sci. USA* 112, 13255–13260.
- Karra, R., Foglia, M.J., Choi, W.Y., Belliveau, C., DeBenedittis, P., and Poss, K.D. (2018). Vegfaa instructs cardiac muscle hyperplasia in adult zebrafish. *Proc. Natl. Acad. Sci. USA* 115, 8805–8810.
- Kawamura, T., Suzuki, J., Wang, Y.V., Menendez, S., Morera, L.B., Raya, A., Wahl, G.M., and Izpisua Belmonte, J.C. (2009). Linking the p53 tumour suppressor pathway to somatic cell reprogramming. *Nature* 460, 1140–1144.
- Kikuchi, K., Holdway, J.E., Werdich, A.A., Anderson, R.M., Fang, Y., Egnaczyk, G.F., Evans, T., Macrae, C.A., Stainier, D.Y., and Poss, K.D. (2010). Primary contribution to zebrafish heart regeneration by gata4(+) cardiomyocytes. *Nature* 464, 601–605.
- Kikuchi, K., Holdway, J.E., Major, R.J., Blum, N., Dahn, R.D., Begemann, G., and Poss, K.D. (2011). Retinoic acid production by endocardium and epicardium is an injury response essential for zebrafish heart regeneration. *Dev. Cell* 20, 397–404.
- Kim, D., Perte, G., Trapnell, C., Pimentel, H., Kelley, R., and Salzberg, S.L. (2013). TopHat2: accurate alignment of transcriptomes in the presence of insertions, deletions and gene fusions. *Genome Biol.* 14, R36.
- Krämer, A., Green, J., Pollard, J., Jr., and Tugendreich, S. (2014). Causal analysis approaches in ingenuity pathway analysis. *Bioinformatics* 30, 523–530.
- Kruiswijk, F., Labuschagne, C.F., and Vousden, K.H. (2015). p53 in survival, death and metabolic health: a lifeguard with a licence to kill. *Nat. Rev. Mol. Cell Biol.* 16, 393–405.
- Lai, S.L., Marin-Juez, R., Moura, P.L., Kuenne, C., Lai, J.K.H., Tsedek, A.T., Guenther, S., Looos, M., and Stainier, D.Y. (2017). Reciprocal analyses in zebrafish and medaka reveal that harnessing the immune response promotes cardiac regeneration. *eLife* 6, e25605.
- Lane, D.P., and Crawford, L.V. (1979). T antigen is bound to a host protein in SV40-transformed cells. *Nature* 278, 261–263.
- Li, H., Collado, M., Villasante, A., Strati, K., Ortega, S., Cañamero, M., Blasco, M.A., and Serrano, M. (2009). The Ink4/Arf locus is a barrier for iPS cell reprogramming. *Nature* 460, 1136–1139.
- Ma, D., Tu, C., Sheng, Q., Yang, Y., Kan, Z., Guo, Y., Shyr, Y., Scott, I.C., and Lou, X. (2018). Dynamics of zebrafish heart regeneration using an HPLC-ESI-MS/MS approach. *J. Proteome Res.* 17, 1300–1308.
- Mak, T.W., Hauck, L., Grothe, D., and Billia, F. (2017). p53 regulates the cardiac transcriptome. *Proc. Natl. Acad. Sci. USA* 114, 2331–2336.
- Mantovani, F., Collavin, L., and Del Sal, G. (2019). Mutant p53 as a guardian of the cancer cell. *Cell Death Differ.* 26, 199–212.
- Marine, J.C., and Lozano, G. (2010). Mdm2-mediated ubiquitylation: p53 and beyond. *Cell Death Differ.* 17, 93–102.
- Marión, R.M., Strati, K., Li, H., Murga, M., Blanco, R., Ortega, S., Fernandez-Capetillo, O., Serrano, M., and Blasco, M.A. (2009). A p53-mediated DNA damage response limits reprogramming to ensure iPS cell genomic integrity. *Nature* 460, 1149–1153.
- Merkle, F.T., Ghosh, S., Kamitaki, N., Mitchell, J., Avior, Y., Mello, C., Kashin, S., Mekhoubad, S., Ilic, D., Charlton, M., et al. (2017). Human pluripotent stem cells recurrently acquire and expand dominant negative P53 mutations. *Nature* 545, 229–233.
- Michael, D., and Oren, M. (2003). The p53-Mdm2 module and the ubiquitin system. *Semin. Cancer Biol.* 13, 49–58.
- Missinato, M.A., Saydmohammed, M., Zuppo, D.A., Rao, K.S., Opie, G.W., Kühn, B., and Tsang, M. (2018). Dusp6 attenuates Ras/MAPK signaling to limit zebrafish heart regeneration. *Development* 145, dev157206.
- Muñoz-Fontela, C., Mandinova, A., Aaronson, S.A., and Lee, S.W. (2016). Emerging roles of p53 and other tumour-suppressor genes in immune regulation. *Nat. Rev. Immunol.* 16, 741–750.
- Nomura, K., Klejnot, M., Kowalczyk, D., Hock, A.K., Sibbet, G.J., Vousden, K.H., and Huang, D.T. (2017). Structural analysis of MDM2 RING separates degradation from regulation of p53 transcription activity. *Nat. Struct. Mol. Biol.* 24, 578–587.
- Nomura, S., Satoh, M., Fujita, T., Higo, T., Sumida, T., Ko, T., Yamaguchi, T., Tobita, T., Naito, A.T., Ito, M., et al. (2018). Cardiomyocyte gene programs encoding morphological and functional signatures in cardiac hypertrophy and failure. *Nat. Commun.* 9, 4435.
- Oliner, J.D., Pietenpol, J.A., Thiagalingam, S., Gyuris, J., Kinzler, K.W., and Vogelstein, B. (1993). Oncoprotein MDM2 conceals the activation domain of tumour suppressor p53. *Nature* 362, 857–860.
- Pant, V., Xiong, S., Jackson, J.G., Post, S.M., Abbas, H.A., Quintás-Cardama, A., Hamir, A.N., and Lozano, G. (2013). The p53-Mdm2 feedback loop protects against DNA damage by inhibiting p53 activity but is dispensable for p53 stability, development, and longevity. *Genes Dev.* 27, 1857–1867.
- Poss, K.D., Wilson, L.G., and Keating, M.T. (2002). Heart regeneration in zebrafish. *Science* 298, 2188–2190.
- Rosen, J.N., Sweeney, M.F., and Mably, J.D. (2009). Microinjection of zebrafish embryos to analyze gene function. *J. Vis. Exp.* 25, 1115.
- Sadek, H., and Olson, E.N. (2020). Toward the goal of human heart regeneration. *Cell Stem Cell* 26, 7–16.
- Sallin, P., de Preux Charles, A.S., Duruz, V., Pfefferli, C., and Jaźwińska, A. (2015). A dual epimorphic and compensatory mode of heart regeneration in zebrafish. *Dev. Biol.* 399, 27–40.
- Stanley-Hasnain, S., Hauck, L., Grothe, D., Aschar-Sobbi, R., Beca, S., Buntany, J., Backx, P.H., Mak, T.W., and Billia, F. (2017). p53 and Mdm2 act synergistically to maintain cardiac homeostasis and mediate cardiomyocyte cell cycle arrest through a network of microRNAs. *Cell Cycle* 16, 1585–1600.
- Thermes, V., Grabher, C., Ristoratore, F., Bourrat, F., Choulika, A., Wittbrodt, J., and Joly, J.-S. (2002). I-SceI meganuclease mediates highly efficient transgenesis in fish. *Mech. Dev.* 118, 91–98.
- Tornini, V.A., Thompson, J.D., Allen, R.L., and Poss, K.D. (2017). Live fate-mapping of joint-associated fibroblasts visualizes expansion of cell contributions during zebrafish fin regeneration. *Development* 144, 2889–2895.
- Tzahor, E., and Poss, K.D. (2017). Cardiac regeneration strategies: staying young at heart. *Science* 356, 1035–1039.
- Utikal, J., Polo, J.M., Stadfeld, M., Maherali, N., Kulalert, W., Walsh, R.M., Khalil, A., Rheinwald, J.G., and Hochedlinger, K. (2009). Immortalization eliminates a roadblock during cellular reprogramming into iPS cells. *Nature* 460, 1145–1148.
- Vousden, K.H., and Lu, X. (2002). Live or let die: the cell's response to p53. *Nat. Rev. Cancer* 2, 594–604.
- Vujic, A., Natarajan, N., and Lee, R.T. (2020). Molecular mechanisms of heart regeneration. *Semin. Cell Dev. Biol.* 100, 20–28.
- Wade, M., Li, Y.C., and Wahl, G.M. (2013). MDM2, MDMX and p53 in oncogenesis and cancer therapy. *Nat. Rev. Cancer* 13, 83–96.
- Wang, J., Panáková, D., Kikuchi, K., Holdway, J.E., Gemberling, M., Burris, J.S., Singh, S.P., Dickson, A.L., Lin, Y.F., Sabeh, M.K., et al. (2011). The regenerative capacity of zebrafish reverses cardiac failure caused by genetic cardiomyocyte depletion. *Development* 138, 3421–3430.
- Williams, A.B., and Schumacher, B. (2016). p53 in the DNA-damage-repair process. *Cold Spring Harb. Perspect. Med.* 6, a026070.
- Wu, C.C., Kruse, F., Vasudevarao, M.D., Junker, J.P., Zebrowski, D.C., Fischer, K., Noël, E.S., Grün, D., Berezikov, E., Engel, F.B., et al. (2016). Spatially resolved genome-wide transcriptional profiling identifies BMP signaling as essential regulator of zebrafish cardiomyocyte regeneration. *Dev. Cell* 36, 36–49.
- Yun, M.H., Gates, P.B., and Brockes, J.P. (2013). Regulation of p53 is critical for vertebrate limb regeneration. *Proc. Natl. Acad. Sci. USA* 110, 17392–17397.
- Zhao, L., Ben-Yair, R., Burns, C.E., and Burns, C.G. (2019). Endocardial Notch signaling promotes cardiomyocyte proliferation in the regenerating zebrafish heart through Wnt pathway antagonism. *Cell Rep.* 26, 546–554 e545.

STAR★METHODS

KEY RESOURCES TABLE

| REAGENT or RESOURCE                                                          | SOURCE                                         | IDENTIFIER       |
|------------------------------------------------------------------------------|------------------------------------------------|------------------|
| <b>Antibodies</b>                                                            |                                                |                  |
| Mouse monoclonal anti-Troponin T                                             | Lab Vision                                     | Cat# MS-295-PABX |
| Rabbit monoclonal anti-Mef2                                                  | Abcam                                          | Cat# ab197070    |
| Rabbit polyclonal anti-dsRed                                                 | Clontech                                       | Cat# 632475      |
| Chicken polyclonal anti-GFP                                                  | Aves Labs                                      | Cat# GFP-1020    |
| Rabbit polyclonal anti-GFP                                                   | Thermo Fisher Scientific                       | Cat # A-11122    |
| Mouse monoclonal anti-GAPDH                                                  | Proteintech                                    | Cat # 60004-1-IG |
| Rabbit polyclonal anti-p53                                                   | GeneTex                                        | Cat# GTX128135   |
| Mouse monoclonal anti-Myosin heavy chain                                     | Developmental Studies Hybridoma Bank           | N2.261           |
| Alexa Fluor 594 Goat anti-Rabbit IgG (H+L)                                   | Thermo Fisher Scientific                       | Cat# A-11037     |
| Alexa Fluor 488 Goat anti-Rabbit IgG (H+L)                                   | Thermo Fisher Scientific                       | Cat# A-11034     |
| Alexa Fluor 594 Goat anti-Mouse IgG (H+L)                                    | Thermo Fisher Scientific                       | Cat# A-11032     |
| Alexa Fluor 488 Goat anti-Mouse IgG (H+L)                                    | Thermo Fisher Scientific                       | Cat# A-11001     |
| Alexa Fluor 488 Goat anti-Chicken IgG (H+L)                                  | Thermo Fisher Scientific                       | Cat# A-11039     |
| Goat anti-Mouse IgG (H+L) Secondary Antibody, HRP                            | Thermo Fisher Scientific                       | Cat# A-31430     |
| Goat anti-Rabbit IgG (H+L) Secondary Antibody, HRP                           | Thermo Fisher Scientific                       | Cat# 65-6120     |
| <b>Chemicals, Peptides, and Recombinant Proteins</b>                         |                                                |                  |
| Metronidazole                                                                | Sigma-Aldrich                                  | Cat#M1547        |
| 5-ethynyl-2-deoxyuridine                                                     | Thermo Fisher Scientific                       | Cat#A10044       |
| DAPI                                                                         | Thermo Fisher Scientific                       | Cat#D3571        |
| Alexa Fluor 488 Azide                                                        | Thermo Fisher Scientific                       | Cat#A10270       |
| Alexa Fluor 594 Azide                                                        | Thermo Fisher Scientific                       | Cat#C10617       |
| <b>Deposited Data</b>                                                        |                                                |                  |
| RNA Sequencing                                                               | GEO database                                   | GSE146859        |
| <b>Experimental Models: Organisms/Strains</b>                                |                                                |                  |
| Zebrafish: <i>Tg(β-actin2:loxP-mTagBFP-STOP-loxP-dnmdm2)<sup>pd313</sup></i> | This paper                                     | <i>pd313</i>     |
| Zebrafish: <i>TgBAC(mdm2:EGFP)<sup>pd312</sup></i>                           | This paper                                     | <i>pd312</i>     |
| Zebrafish: <i>Tg(tp53)<sup>M214K</sup></i>                                   | <a href="#">Berghmans et al., 2005</a>         | <i>M214K</i>     |
| Zebrafish: <i>Tg(β-actin2:loxP-mCherry-STOP-loxP-DTA)<sup>pd36</sup></i>     | <a href="#">Wang et al., 2011</a>              | <i>pd36</i>      |
| Zebrafish: <i>Tg(β-actin2:loxP-mTagBFP-STOP-loxP-nrg1)<sup>pd107</sup></i>   | <a href="#">Gemberling et al., 2015</a>        | <i>pd107</i>     |
| Zebrafish: <i>Tg(β-actin2:loxP-mTagBFP-STOP-loxP-vegfaa)<sup>pd262</sup></i> | <a href="#">Karra et al., 2018</a>             | <i>pd262</i>     |
| Zebrafish: <i>Tg(cmlc2:CreER)<sup>pd10</sup></i>                             | <a href="#">Kikuchi et al., 2010</a>           | <i>pd10</i>      |
| Zebrafish: <i>Tg(gata4:EGFP)<sup>ae1</sup></i>                               | <a href="#">Heicklen-Klein and Evans, 2004</a> | <i>ae1</i>       |
| Zebrafish: <i>Tg(gata4:dsRed2)<sup>pd28</sup></i>                            | <a href="#">Karra et al., 2015</a>             | <i>pd28</i>      |
| <b>Software and Algorithms</b>                                               |                                                |                  |
| Tophat2                                                                      | <a href="#">Kim et al., 2013</a>               | Version 2.1.1    |
| Biostrings                                                                   | Bioconductor                                   | Version 2.56.0   |
| DESeq2                                                                       | Bioconductor                                   | Version 1.26.0   |
| Ingenuity Pathway Analysis                                                   | QIAGEN, <a href="#">Krämer et al., 2014</a>    | 830011           |

## RESOURCE AVAILABILITY

### Lead Contact

Further information and requests for resources and reagents should be directed to and will be fulfilled by the Lead Contact, Kenneth Poss ([kenneth.poss@duke.edu](mailto:kenneth.poss@duke.edu)).

### Materials Availability

Unique reagents generated in this study are available upon request.

### Data and Code Availability

RNA-seq data is deposited in NCBI GEO database under accession number GSE146859.

## EXPERIMENTAL MODEL AND SUBJECT DETAILS

Wild-type or transgenic zebrafish of the EK/AB strain were used for all experiments. *β-actin2:loxp-mCherry-STOP-loxp-DTA<sup>pd36</sup>* (Wang et al., 2011), *β-actin2:loxp-mTagBFP-STOP-loxp-nrg1<sup>pd107</sup>* (Gemberling et al., 2015), *β-actin2:loxp-mTagBFP-STOP-loxp-vegfaa<sup>pd262</sup>* (Karra et al., 2018), *cmlc2:CreER<sup>pd10</sup>* (Kikuchi et al., 2010), *gata4:EGFP* (Heicklen-Klein and Evans, 2004), *gata4:ds-Red2<sup>pd28</sup>* (Karra et al., 2015), *tp53<sup>M214K</sup>* (Berghmans et al., 2005) transgenic mutant or fish have been previously described. Resection of ~20% of the cardiac ventricular apex was performed as described previously (Poss et al., 2002). To induce expression of *nrg1* or *vegfaa* in CMs, adult *cmlc2:CreER*; *β-act2:BS-nrg1* or *β-actin2:loxp-mTagBFP-STOP-loxp-vegfaa* zebrafish were treated for 24 hours with 5 μM tamoxifen. To induce recombination in adult *cmlc2:CreER*; *βact2:BS-m2DN* fish, animals were bathed 3 sequential days in 5 μM 4-HT (Sigma) for 10-12 hours. Heart injuries were performed 3 days after the final 4-HT treatment. To induce ablation of CMs, adult ZCAT animals were treated for 24 hours with 0.5 - 1.0 μM tamoxifen titrated for ablation of ~50% CMs (Wang et al., 2011). For EdU-incorporation experiments 10 mM EdU (Sigma) was injected intraperitoneally once daily for 3 days before collection. Procedures involving animals were approved by the Institutional Animal Care and Use Committee at Duke University.

## METHOD DETAILS

### Ingenuity pathway and gene ontology analyses

Pathway analysis of was performed using Ingenuity Pathway Analysis (IPA) software on the following published datasets: ventricle 7 dpi versus sham GSE75894 (Kang et al., 2016), ventricle 14 dpi versus sham GSE81865 (Goldman et al., 2017). Mouse orthologs of differentially expressed genes with  $p < 0.01$  and  $-1 < \log_2FC < 1$ , retrieved via [www.ensembl.org/biomart/martservice](http://www.ensembl.org/biomart/martservice), were analyzed to find upstream regulators and pathways showing differential modulation upon injury. IPA analyses were performed with the following settings: Expression Value Type (Exp Log Ration), Reference set (Ingenuity Knowledge Base), Relationships to consider (Direct and Indirect Relationships), Interaction networks (70 molecules/network; 25 networks/analysis or 30 molecules/network; 25 or 10 network/analysis), Data Source (all), Confidence (Experimentally Observed), Species (Human, Mouse, Rat), Tissue & Cell Lines (all), Mutations (all) (Krämer et al., 2014). P values in Figure 1A measure the statistical significance of the overlap between differentially expressed genes and the genes under predicted control of a regulator, and activation scores infer the activation state of a regulator, either activating (positive) or inhibiting (negative). Gene Ontology analyses were performed with The PANTHER database (Protein Analysis Through Evolutionary Relationships, <http://pantherdb.org>).

### RNA extraction and sequencing

Zebrafish ventricles were collected and placed in cold PBS while still pumping to help decrease intra-ventricular blood. Atrium and outflow tract were removed and ventricles (5 per sample) were homogenized in Trizol using a Tissue Lyser II (QIAGEN). RNA was extracted using the standard Trizol protocol, genomic DNA removed using RNA clean and Concentrator Kit (Zymo Research) and processed for preparation of libraries. Single-end 50-bp sequencing, with 30 million reads/sample was performed at BGI. RNA-Seq reads were trimmed by Trim Galore (0.6.4, with -q 15) and then mapped with TopHat (v 2.1.1, with parameters-b2-very-sensitive-no-coverage-search and supplying the UCSC danRer10 refSeq gene annotation) (Kim et al., 2013). Gene-level read counts were obtained using the htseq-count (v1.6.1) by the reads with MAPQ greater than 30. DESeq2 (v 1.26.0) was employed for differential expression analysis. Bioconductor package Biostrings software (v 2.56.0) was used to analyze predicted transcription factor binding motifs. The RNA-Seq data generated in this study have been deposited in the NCBI GEO database under accession number GSE146859.

### Western blotting

Zebrafish ventricles were collected and placed in cold PBS while still pumping to help decrease intra-ventricular blood. Atrium and outflow tract were removed and ventricles (8-10 per sample) were homogenized in RIPA buffer containing Proteinase and Phosphatase inhibitor (Thermo Fisher Scientific #78442) and Phenylmethanesulfonyl fluoride solution (Sigma #93482). Samples were denatured at 95°C for 5 min, quantified and tissue lysates were analyzed on Mini-Protein tetra cell (Bio-Rad) using sodium dodecyl sulfate

polyacrylamide gel electrophoresis (SDS-PAGE) in Tris/glycine/SDS buffer. After electrophoresis proteins were transferred to a PVDF membrane using the Mini-Protein tetra cell in Tris/glycine buffer (v/v). Membranes were blocked for 1 h at room temperature using 5% BSA in Tris-buffered saline and Tween-20 (TBST), then were incubated with primary anti-Tp53 antibody (GTX128135, 1:500) and anti-GAPDH (Proteintech 60004-1-IG, 1:500) overnight at 4°C. Membranes were incubated with appropriate HRP-conjugated secondary antibodies (Thermo Fisher Scientific), washed in TBST and developed with Pierce ECL western blotting substrate. Western blot signals were quantified as described in [Davarinejad \(2017\)](#).

### Generation of transgenic zebrafish

A 2A-mCherry fragment was amplified from a *g4DN* template described previously ([Gupta et al., 2013](#)), generated using the primer sequences 2A-mCherry forward: CCGGCGCGCCT GCTACGAACCTCTCTGTAAAGCAAGCAGGGGACGTGGAA GAAAACCCTGGTCCTATGGTGAGCAAGGGCGAGGAGACAAC; 2A-mCherry reverse: GATATCGCGGCCGCTTACTTGTACA GCTCGTCCATGCC. The PCR product was ligated into the *AscI/NotI* site of the  $\beta$ -act2:*loxP-TagBFP-STOP-loxP*-vector ([Gupta et al., 2013](#)). *Mdm2* cDNA lacking the C-terminal RING finger domain was amplified using the primer sequences *mdm2* forward: ATGGCAACAGAGAGTTGTTAAGCAG; *mdm2* dominant negative reverse: GCACGTAGCGGGAAGGC. The PCR product was ligated into the *AgeI/AscI* site of the  $\beta$ -act2:*loxP-TagBFP-STOP-loxP-2A-mCherry*. The full name of this transgenic line is *Tg*( $\beta$ -act2:*loxP-mTagBFP-STOP-loxP-dnmdm2*)<sup>pd313</sup>.

*mdm2:EGFP*. The translational start codon of *mdm2* in the BAC clone CH211-209G11 (BACPAC Resources Center) was replaced with the EGFP sequence by Red/ET recombineering technology (GeneBridges) as described in [Kikuchi et al. \(2011\)](#). The entire construct was flanked with *I-SceI* sites allowing meganuclease mediated transgenesis as previously described ([Thermes et al., 2002](#)). After purifying the final BAC with nucleobond BAC 100 kit (Clontech) the BAC was co-injected along with *I-SceI* into one-cell embryos. A single founder was isolated and propagated. The full name of this transgenic line is *TgBAC*(*mdm2:EGFP*)<sup>pd312</sup>.

*mdm2*<sup>pd314</sup> mutants were generated using injection of CRISPR/Cas9 and gRNAs at the one-cell stage as previously described ([Tornini et al., 2017](#)). Exon 3 was targeted using oligo 5'-GCGTAATACGACTCACTATAGGGCAATTGAAAAGCCTGTTAGAGGGTTT TAGAGCTAGAAATAGC-3' (target sequence underlined). Intron 3 was targeted using oligo 5'-GCGTAATACGACTCACTA TAGGGGGTGGGGTTTTACAACAACAGGGTTTTAGAGCTAGAAATAGC-3' (target sequence underlined) resulting in a 1.7 kb deletion. Deletion lines were genotyped using primers: *mdm2\_KO\_for* 5'-GCAGTTCTCAGATCAGCAAGGTTG-3'; *mdm2\_prom\_rev* 5'-GCTGAAAAGTGACCTTCGCCATC-3'; and *mdm2\_geno\_rev* 5'-GGCAAATATCCAGATAGTGCCACC-3'. Wild-type embryos yield an expected amplicon of 455 bp, with homozygous mutants containing a single 180 bp amplicon. Heterozygotes produce 455 bp and 180 bp amplicons.

### Histological analysis and imaging

Primary and secondary antibody staining for immunofluorescence was performed as described in [Kikuchi et al. \(2011\)](#). Antibodies used in this study were anti-troponin T (mouse; Lab Vision, 1:200), anti-Mef2 (rabbit; Abcam, 1:100), anti-EGFP, (rabbit; Thermo Fisher Scientific, 1:200), anti-EGFP (chicken; Aves Labs, 1:1000), anti-dsRed (rabbit; Clontech, 1:200), anti-myosin heavy chain N2.261 (mouse; Developmental Studies Hybridoma Bank, 1:50), Alexa Fluor 488 (chicken and rabbit; Life Technologies, 1:200), Alexa Fluor 594 (mouse and rabbit; Life Technologies, 1:200). Confocal imaging was performed using a Zeiss LSM 700 or a Zeiss LSM 880 microscope. Tissue for CM proliferation was placed immediately into ice-cold 30% sucrose in PBS before being transferred to cold TFM (VWR). Hearts were flash frozen in dry ice ethanol bath. After sectioning hearts were fixed for 15 min with 3.7% formaldehyde (Sigma). Sections were stained for EdU, washed with PBS + 0.2% Triton (Sigma). Staining for Mef2, imaging, and counting were performed as previously described ([Kikuchi et al., 2011](#)). Proliferation indices were quantified using 3 sections per heart. Hearts for whole mount imaging were collected and fixed overnight in 4% paraformaldehyde at 4°C and imaged as previously described ([Gupta et al., 2013](#)).

### mdm2 mRNA injections

Dominant negative *mdm2* cDNA was transcribed and subcloned into the multicloning site of a pCS2<sup>+</sup> vector containing an SP6 promoter and poly-A tail using *Clal* and *EcoRI* restriction sites. mRNA was generated using the SP6 mMachine mMessage kit (Ambion) and 200 ng/uL was injected into single-cell embryos as described ([Rosen et al., 2009](#)).

### QUANTIFICATION AND STATISTICAL ANALYSIS

Clutchmates were randomized into different treatment groups for each experiment. No animal or sample was excluded from the analysis. All experiments other than western blots were performed with at least two biological replicates. All statistical values are displayed as Mean  $\pm$  Standard Deviation or Mean  $\pm$  Standard Error of the Mean, as indicated in the figure legends. Statistical tests were calculated using two-tailed Student's *t* tests or Mann-Whitney *U* tests.

**Cell Reports, Volume 32**

**Supplemental Information**

**Tp53 Suppression Promotes  
Cardiomyocyte Proliferation  
during Zebrafish Heart Regeneration**

**Adam Shoffner, Valentina Cigliola, Nutishia Lee, Jianhong Ou, and Kenneth D. Poss**

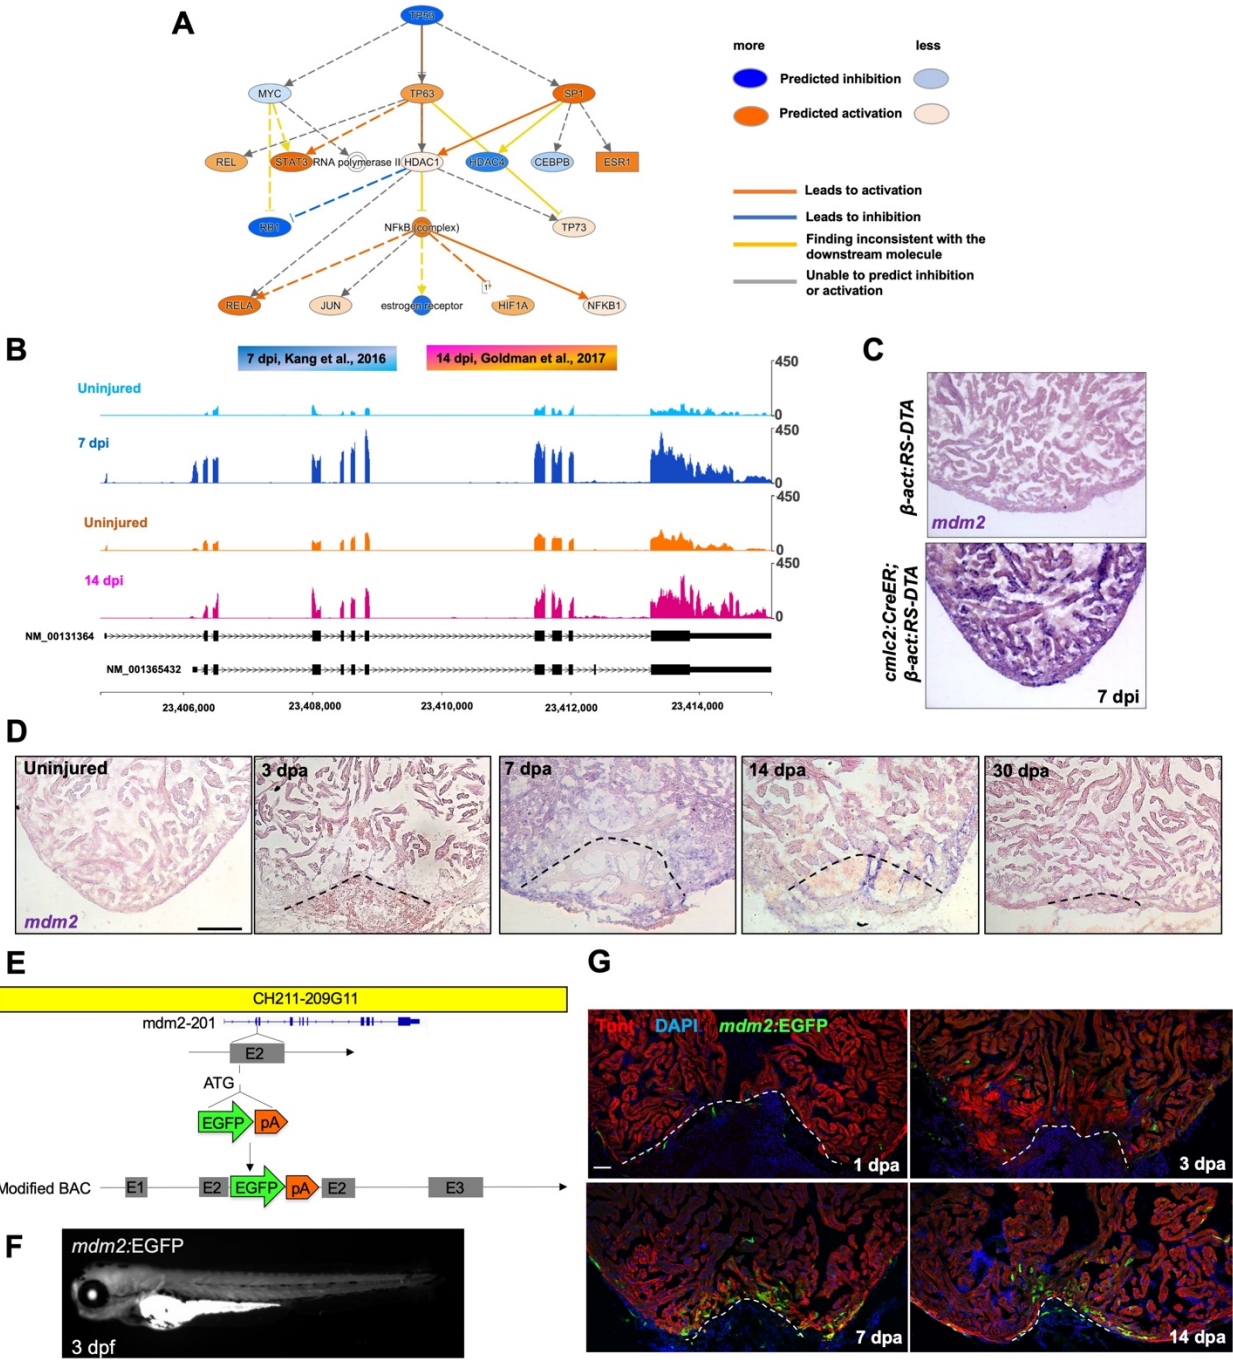

**Figure S1 (related to Figure 1). *mdm2* expression is induced after heart injury. (A)**

Analysis of transcriptome data of 7 dpi regenerating zebrafish published by Kang et al., 2016. Solid arrows indicate direct and dashed arrow indicates indirect interactions. Predictions on the direction and intensity of activation and inhibition by TP53 were made by IPA knowledgebase, based on published literature. **(B)** Genome browser tracks indicating expression of *mdm2* 7 days and 14 days after induced CM ablation (dpi), versus uninjured ventricles. **(C)** In situ hybridization for *mdm2* (violet) in sections of control (no CreER) and injured (7 dpi) ventricles, 7 days after tamoxifen administration. **(D)** In situ hybridization for *mdm2* in ventricular sections at different time points after resection of the ventricular apex (dpa). Dashed lines approximate the resection plane. Scale bars: 100  $\mu$ m. **(E)** Cartoon showing the *mdm2:EGFP* BAC transgene. **(F)** Larval *mdm2*-directed fluorescence, shown at 3 day post fertilization (dpf). **(G)** Images showing *mdm2*-directed EGFP at different time points after resection of the ventricular apex. Tnnt marks CMs. Dashed lines approximate resection plane. Scale bars: 100  $\mu$ m.



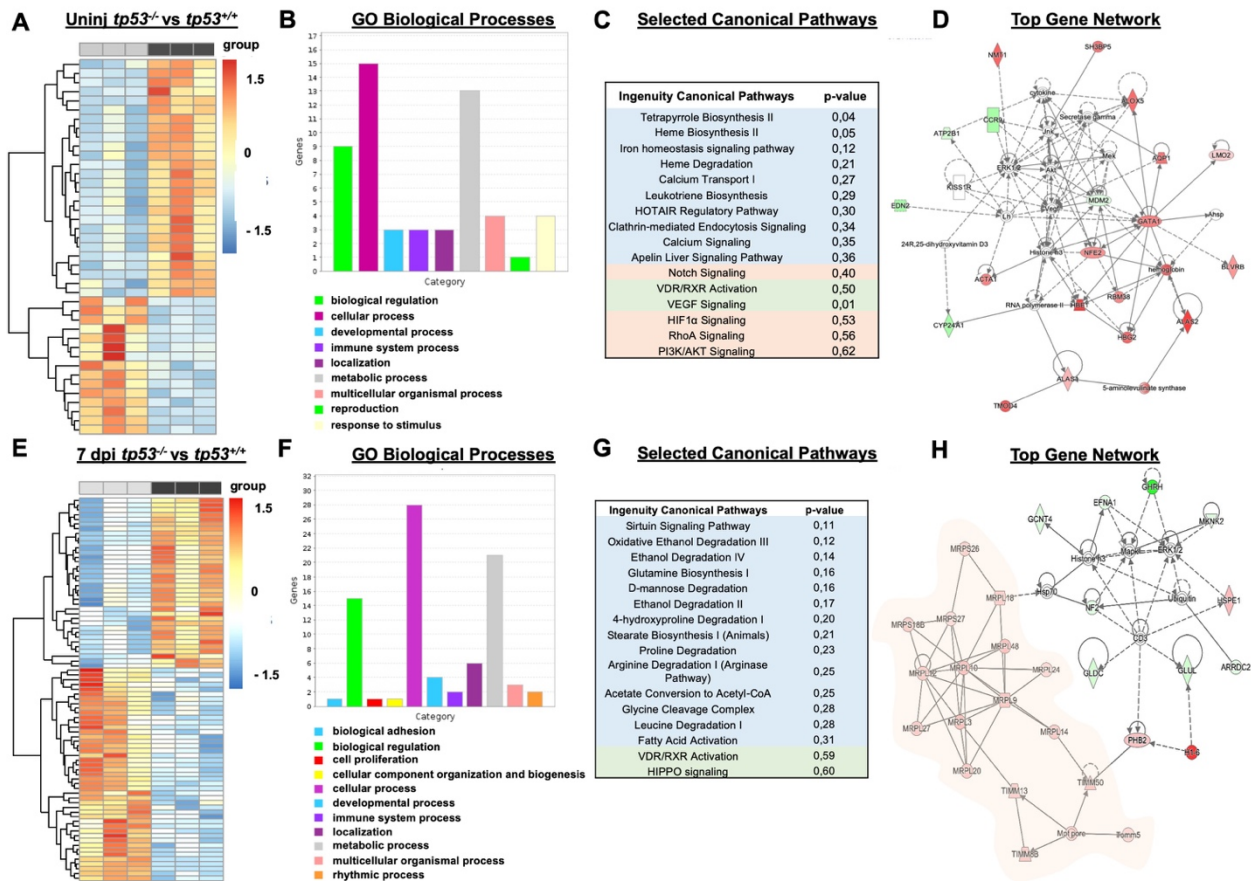

**Figure S2 (related to Figure 2). *tp53*<sup>+/+</sup> and *tp53*<sup>-/-</sup> transcriptomic data.** (A) Heatmap showing 42 genes differentially modulated in uninjured ventricles (Table S5). Black bars, *tp53*<sup>-/-</sup>. Grey bars, *tp53*<sup>+/+</sup>. (B, C) Barplot showing different biological processes assessed by GO analysis (B), and a list of selected differentially modulated canonical pathways assessed by Ingenuity Pathway Analysis (C; Table S7). (D) Top gene network composed by genes differentially modulated between uninjured *tp53*<sup>-/-</sup> and *tp53*<sup>+/+</sup> ventricles. (E) Heatmap showing 82 genes differentially modulated between *tp53*<sup>-/-</sup> and *tp53*<sup>+/+</sup> ventricles at 7 days after genetic CM ablation (Table S6). (F, G) Barplot showing different biological processes assessed by GO analysis (F), and a list of selected differentially modulated canonical pathways assessed by Ingenuity Pathway Analysis (G; Table S8). (H) Top gene network composed by genes differentially modulated in regenerating *tp53*<sup>-/-</sup> and *tp53*<sup>+/+</sup> ventricles.

**A**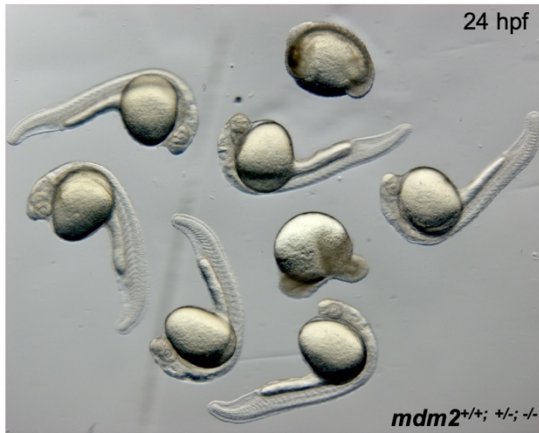**B**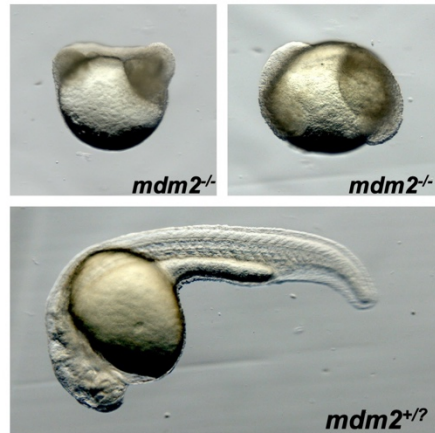**C**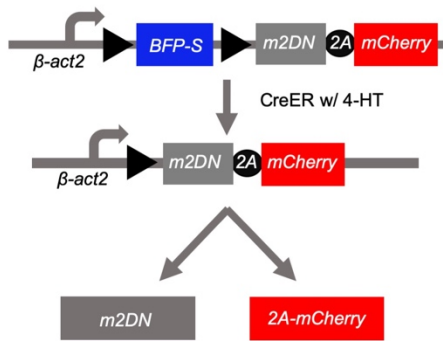**D**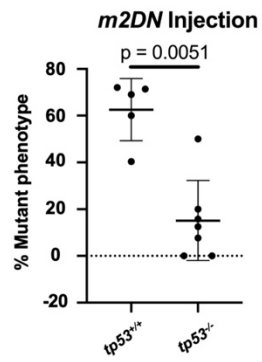**E**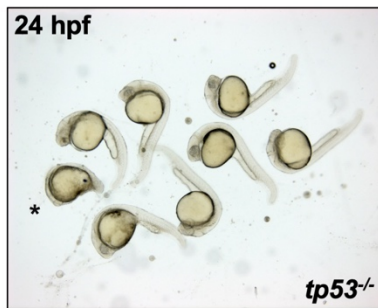**F**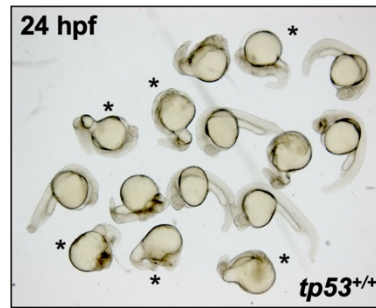

**Figure S3 (related to Figure 2). Effects of *mdm2* deletion mutations and *dn-mdm2* construct expression in zebrafish embryos. (A, B)** Images showing *mdm2*<sup>+/+</sup>, *mdm2*<sup>+/-</sup>, and *mdm2*<sup>-/-</sup> embryos from an *mdm2*<sup>+/-</sup> cross at 24 hours post fertilization (hpf). **(C)** Cartoon schematic of *β-act2:BSm2DN* transgene. Mutations within or loss of this Mdm2 critical domain have been demonstrated both to phenocopy and fail to rescue *mdm2* mutant mice or zebrafish. **(D)** Percentage of larvae recapitulating the *mdm2*<sup>-/-</sup> mutant phenotype upon injection of *m2DN* mRNA into single-cell embryos. This construct had limited effects in *tp53* mutant embryos. **(E, F)** Images showing *m2DN*-injected *tp53*<sup>-/-</sup> and *tp53*<sup>+/+</sup> larvae 24 hours post fertilization (24 hpf). Asterisks indicate embryos with gross morphological defects.

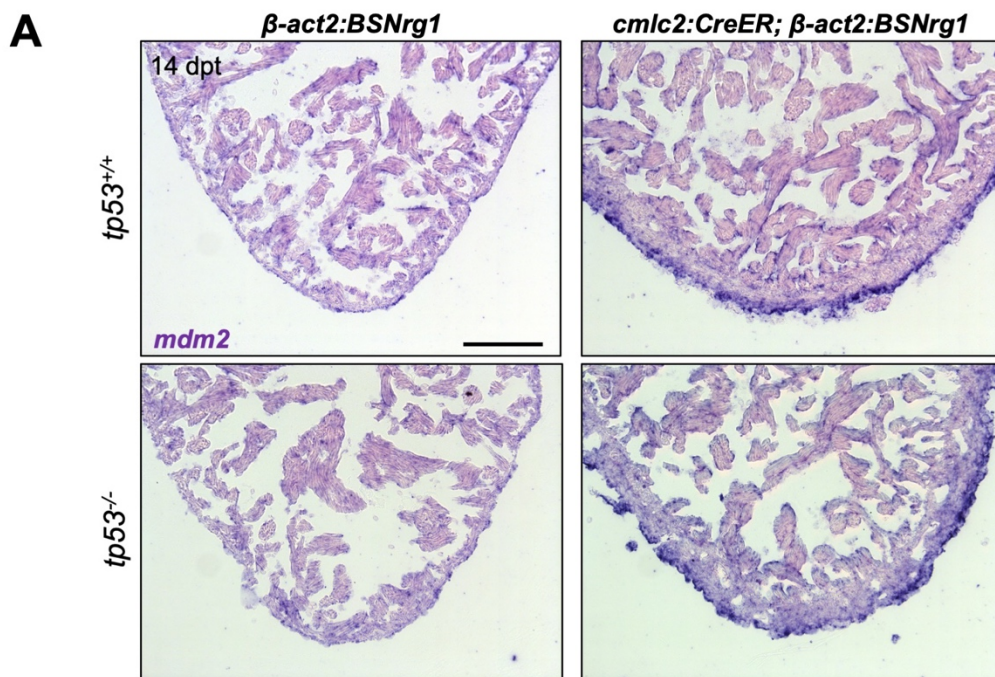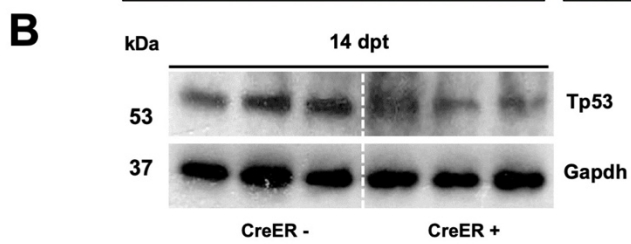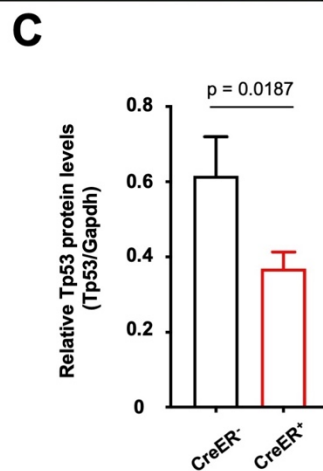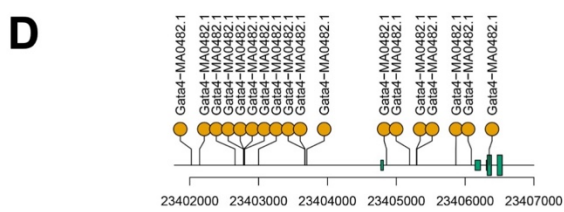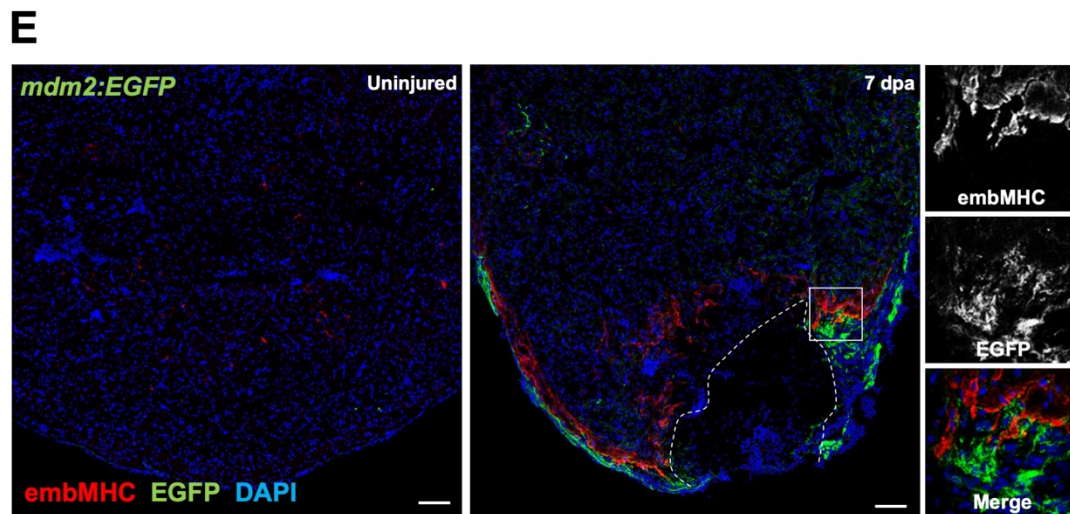

**Figure S4 (related to Figures 3 and 4). Modulation of Tp53 and *mdm2* in Nrg1-overexpressing hearts, and localization of embMHC with *mdm2*-directed fluorescence. (A)** In situ hybridization for *mdm2* on ventricular sections with (right) or without (left) Nrg1 overexpression in *tp53*<sup>+/+</sup> and *tp53*<sup>-/-</sup> animals. *mdm2* is similarly induced in both *tp53* genotypes, at the peripheral edge of cortical muscle. Scale bars: 100  $\mu$ m. **(B)** Western blot to detect Tp53, from control cardiac proteins and proteins extracted 14 days after Nrg1 induction. **(C)** Quantification of western blot protein bands. Eight to 10 hearts were pooled per sample. Data are represented as mean  $\pm$  SEM (unpaired t-test). **(D)** Schematic of the *mdm2* promoter region showing potential binding sites for the transcription factor Gata4. Region shown is from 3 kb upstream to 2,226 bp downstream of the *mdm2* transcriptional start site. **(E)** Immunofluorescence staining for EGFP and embMHC at 7 dpa indicates co-expression but not co-localization of the two markers. Dashed line indicates approximate injury plane. Right panels are high-mag views of box. Scale bars: 50  $\mu$ m.
